# Supplementary material
Source: PubMed Central journal article supplement (PMC7749339)
Supplement: pnas.2013968117.sapp.pdf [file pnas.2013968117.sapp.pdf]

## Supplementary Information for

### Transforming yeast peroxisomes into microfactories for the efficient production of high-value isoprenoids

Simon Dusséaux, William Thomas Wajn, Yixuan Liu, Codruta Ignea, Sotirios C. Kampranis\*

Biochemical Engineering Group, Plant Biochemistry Section, Department of Plant and Environmental Sciences,  
University of Copenhagen, Thorvaldsensvej 40, 1871 Frederiksberg C, Denmark

\*Corresponding author. E-mail: [soka@plen.ku.dk](mailto:soka@plen.ku.dk)

#### **This PDF file includes:**

Supplementary Methods  
Figures S1 to S6  
Tables S1 to S8

## Supplementary Methods.

**Chemicals and enzymes.** All chemicals were reagent grade. Standards used, such as (*R*)-(+)-limonene (Sigma-Aldrich, 62118), (*S*)-(-)-limonene (Sigma-Aldrich, 62128) and geraniol (Sigma-Aldrich, 48798), were purchased from Merck Life Science A/S (Søborg, Denmark). Isopropyl myristate and dodecane were purchased from PanReac AppliChem. DNA restriction enzymes, USER® Enzyme, Antarctic phosphatase enzyme and T4 DNA ligase were obtained from New England Biolabs (Herlev, Denmark) and used according to the manufacturer's instructions. The proofreading Q5U® Hot Start High-Fidelity DNA Polymerase (New England Biolabs, M0515S) was used for PCR amplification prior to vector construction, and the Phusion High-Fidelity DNA Polymerase (New England Biolabs, M0530S) was used for routine, control PCR amplifications. QIAprep Spin Miniprep Kit (Qiagen ID: 27104) was used for plasmid purification.

**Yeast media.** Synthetic defined (SD) 2% glucose media was composed of 0.13% (w/v) Yeast Synthetic Drop-out Medium Supplements without histIDI1ne, leucine, tryptophan and uracil (Sigma-Aldrich, Y2001), 0.67% (w/v) Yeast Nitrogen Base w/o AA (Y2025, US Biologicals) and 2% (w/v) D-(+)-glucose monohydrate (16301, Sigma). For galactose-based SD media, glucose was substituted by 2% (w/v) D-(+)-galactose (MG05201, CarboSynth) and 1% (w/v) D-(+)-raffinose pentahydrate (OR06197, CarboSynth). For the slow glucose release SD media, glucose was substituted by 2.5% (w/v) Enpump 200 substrate (Enpresso GmbH) and 0.075% of reagent A (glucose releasing agent). The total available glucose content was experimentally determined to be 20 g/L with a release rate of 0.2 g L<sup>-1</sup> h<sup>-1</sup> upon addition of reagent A. 2X SD media refer to SD media with double concentration of each component. Where needed, 5-fluoroorotic acid (FOA; Zymo Research, F9003) was added to SD media at a concentration of 1 mg/mL alongside 0.002% (w/v) histIDI1ne and uracil, 0.004% (w/v) tryptophan and leucine. Plates contained 2% (w/v) bacto-agar without pH adjustment.

**Growth conditions.** *E. coli* strains were grown aerobically at 37 °C in Luria-Bertani (LB) medium supplemented, when necessary, with ampicillin (100 µg/mL) and/or chloramphenicol (30 µg/ml). Agar (15 g/L) was added prior to sterilization for LB agar plates. Selection of yeast transformants and pre-cultivation were conducted in SD 2% (w/v) glucose solid or liquid media, supplemented with appropriate amino acids. Typical batch cultures for terpene production and quantification were performed in a 100 mL shake flask containing 9 mL of 2-times concentrated

SD galactose media (or SD Enpump media) that was inoculated from a fully-grown overnight culture to reach a starting  $OD_{600nm} = 0.5$ . Cells from the overnight pre-culture were washed 2-times with sterile ddH<sub>2</sub>O prior to inoculation to remove all traces of glucose. Isopropyl myristate (IPM) was added as an overlay at 10% (v/v) (1 mL) right after inoculation to trap the monoterpenes. For CBGA production, the culture was performed without IPM and supplemented with 0.5 mM olivetolic acid 4 h after inoculation. Cells were then grown for 96 h at 30 °C and 150 rpm shaking. Semi-continuous fed-batch cultures were conducted in an identical manner than batch cultures except that cells were fed every 48 h with 4% (w/v) galactose and 2% (w/v) raffinose and the pH was adjusted to 4.5. The IPM layer was harvested every 48 h to measure monoterpene production.

**Transformation procedures.** *E. coli Mach1*<sup>TM</sup> cells were made competent and transformed using the Mix & Go! *E. coli* Transformation Kit (Zymo Research, USA) following the manufacturer procedure. *S. cerevisiae* strains (Supplementary Table 1) were transformed by the lithium acetate method as previously described in (8). After 45 min incubation at 30 °C and 15 min of heat shock at 42 °C, cells were plated on SD agar media lacking uracil, leucine, histidine and tryptophan. Single colonies were chosen from the plate and streaked separately on SD agar plate lacking uracil, leucine, histidine and tryptophan. The transformants were screened using PCR amplification of the relevant gene(s).

**Analytical procedures.** The cell concentration was measured by monitoring the optical density (OD) at 600 nm. For quantification of monoterpene, the two-phase cultures were centrifuged at 3900 x g for 10 min, at 20 °C, to separate the IPM and aqueous layers. The IPM top layer was then collected and diluted in hexane accordingly so that the measured concentration would fall in the linear range of the standard curve. Routinely, the IPM overlay was diluted 1:10 in hexane, in the case of regular batch culture, or 1:100 in hexane, in the case of semi-continuous fed-batch culture. The diluted sample was analyzed by GC-FID. For cannabinogenic acid extraction, cultures were centrifuged at 3900 x g for 10 min, at 20 °C, to separate cells from the media. Pellets were then resuspended in 1 mL water and subsequently extracted with an ethyl acetate and formic acid (0.05% v/v) mixture in a 2:1 ratio. The mixture was vortexed for 10 min with glass beads. The organic phase was separated by centrifugation at 15,000 x g for 10 min. Extraction was repeated three times and the ethyl acetate fractions were pooled, evaporated using a SpinVac and resuspended in methanol prior to LC-MS analysis. GC-FID analysis was performed using an

HP-5MS Ultra Inert column (Agilent Technologies) with a (5%-Phenyl)-methylpolysiloxane stationary phase. Column dimensions were 30 m length  $\times$  0.25 mm internal diameter  $\times$  0.25 film thickness. Hydrogen was used as a carrier gas at a constant linear velocity of 50 cm s<sup>-1</sup>. Samples were analyzed utilizing the following oven program: 3 min hold at 40 °C, ramp to 80 °C at a rate of 3 °C/min followed by a ramp to 300°C at a rate of 30°C/min and a 10 min hold. Quantification was carried out by comparison with pure standards. Analysis of *trans*-isopiperitenol and 8-hydroxygeraniol were performed on a Shimadzu 2010 GC-MS using a ZB-5ms column and helium as a carrier gas with a constant velocity of 37 cm s<sup>-1</sup>. Samples were diluted 1:100 in hexane before injection of 1  $\mu$ l and analyzed using the following program: 3 min hold at 40 °C, ramp to 80 °C at a rate of 3 °C/min followed by a ramp to 300 °C at a rate of 30 °C/min and a 10 min hold. Qualitative LC-ESI-MS analysis was performed on the Dionex UltiMate® 3000 Quaternary Rapid Separation UHPLC focused system (Thermo Fisher Scientific, Germering, Germany) equipped with a Phenomenex Kinetex XB-C18 column (150 mm  $\times$  2.1 mm i.d., 1.7  $\mu$ m particle size, 100 Å pore size) (Phenomenex, Inc., Torrance, CA, USA). The column was operated at 40 °C, and the flow rate was maintained at 0.3 mL/min. The mobile phases were water (A) and acetonitrile (B), both containing 0.05% formic acid. Separations were performed using the following gradient profile: 0 min, 2% B; 1 min, 2% B; 15 min, 98% B; 18 min, 98% B; 19 min, 2% B; 26 min, 2% B. The column outlet was connected to a Bruker Daltonics Compact QqTOF mass spectrometer equipped with electrospray ionization (ESI) interface (Bruker Daltonics, Bremen, Germany). Mass spectra were acquired in negative ion mode, using a capillary voltage of 4500 V, an end plate offset of - 500 V, a drying temperature of 220 °C, a nebulizer pressure of 1.2 bars, and a drying gas flow of 8 L/min. Accurate mass was calibrated using an internal standard of Sodium formate calibrant injected at the beginning of each chromatographic run. All data was analyzed using the Data Analysis 4.3 (Bruker Daltonics) software program.

## Supplementary Figures

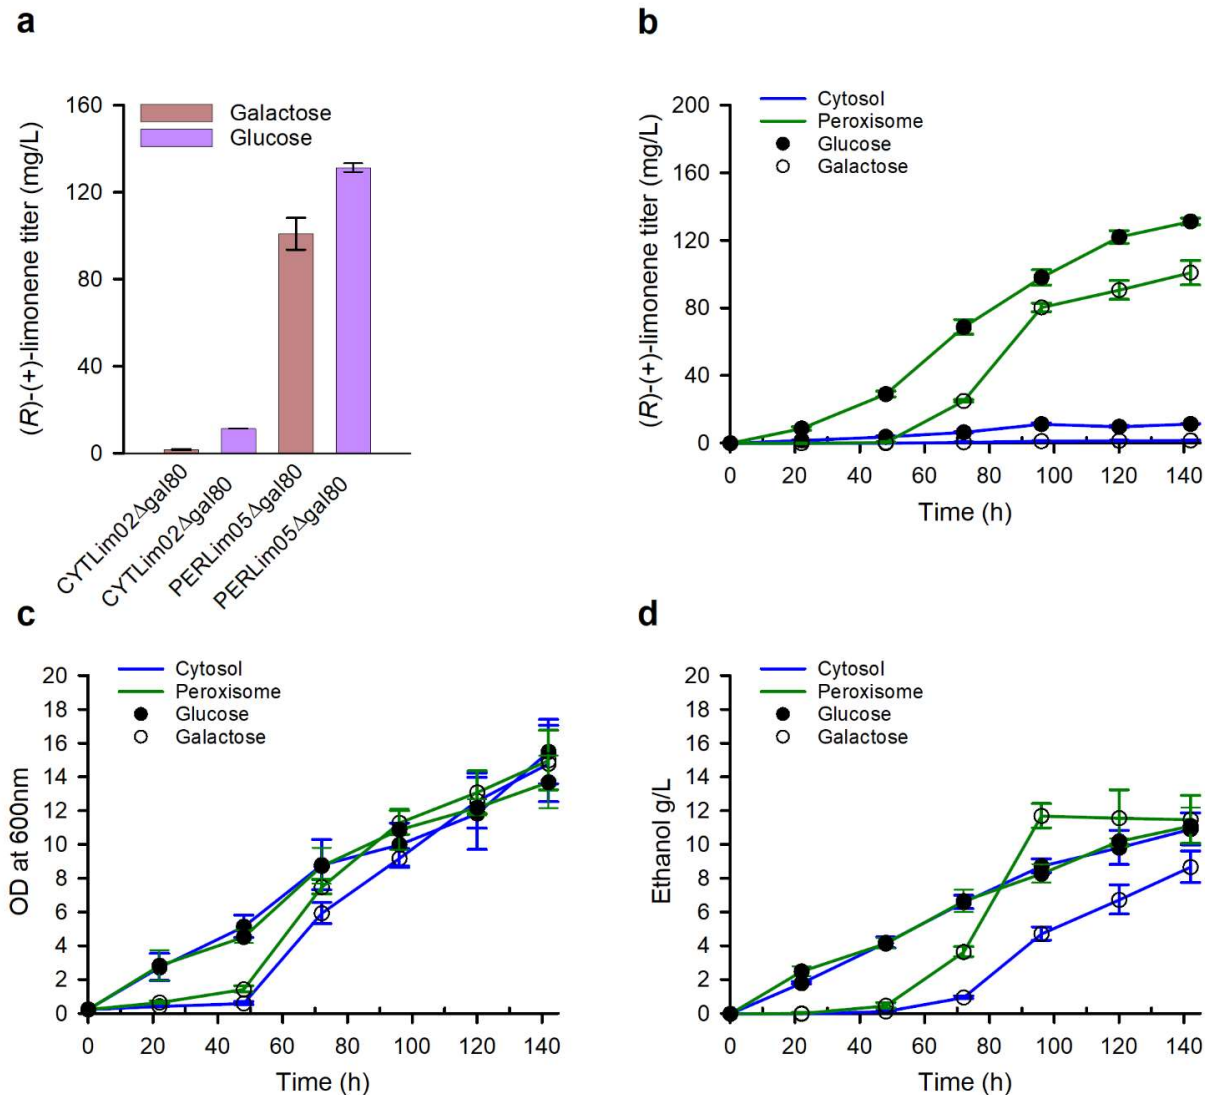

**Figure S1. Batch cultures of strains CYTLim02Δgal80 and PERLim05Δgal80.** Strains CYTLim02Δgal80 and PERLim05Δgal80 were cultivated in SD-galactose/raffinose (brown) or SD-Enpump (slow glucose release, purple) media and the limonene production was measured after 142 hours (a). Time courses of limonene (b), biomass (c) and ethanol (d) accumulation throughout the cultivation with either glucose (closed circle) or galactose (open circle) for the cytosolic pathway (CYTLim02Δgal80, blue line) and for the peroxisomal pathway (PERLim05Δgal80, green line). Error bars correspond to the standard deviation around the mean (n=2, corresponding to two biological replicates).

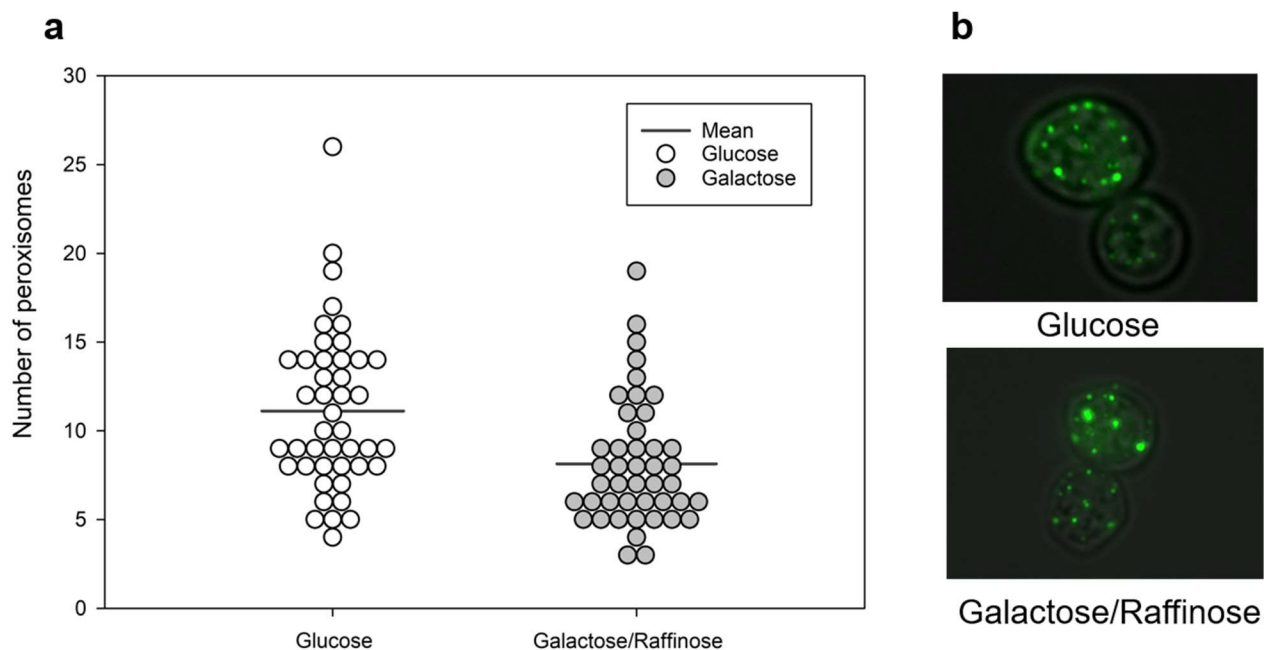

**Figure S2. Comparison of the average number of peroxisomes in strain PERGFP grown with glucose or galactose/raffinose as carbon source.** Cultures were performed in standard SD 2% (w/v) glucose media or SD 2% (w/v) galactose/1% (w/v) raffinose media. **a.** Peroxisomes were counted using fluorescence microscopy in the strain PERGFP expressing a GFP variant targeted to the peroxisome by fusion of the C-terminal SKL PTS1 tag. In each condition, 50 individual cells were assessed for their peroxisome number, which is then represented by a white circle (glucose condition) or a grey circle (galactose/raffinose) in the graph. The mean number of peroxisomes in each of the two conditions is shown with a gray line. **b.** Typical image for a PERGFP yeast cell grown with glucose as carbon source (top) or galactose/raffinose as carbon source (bottom).

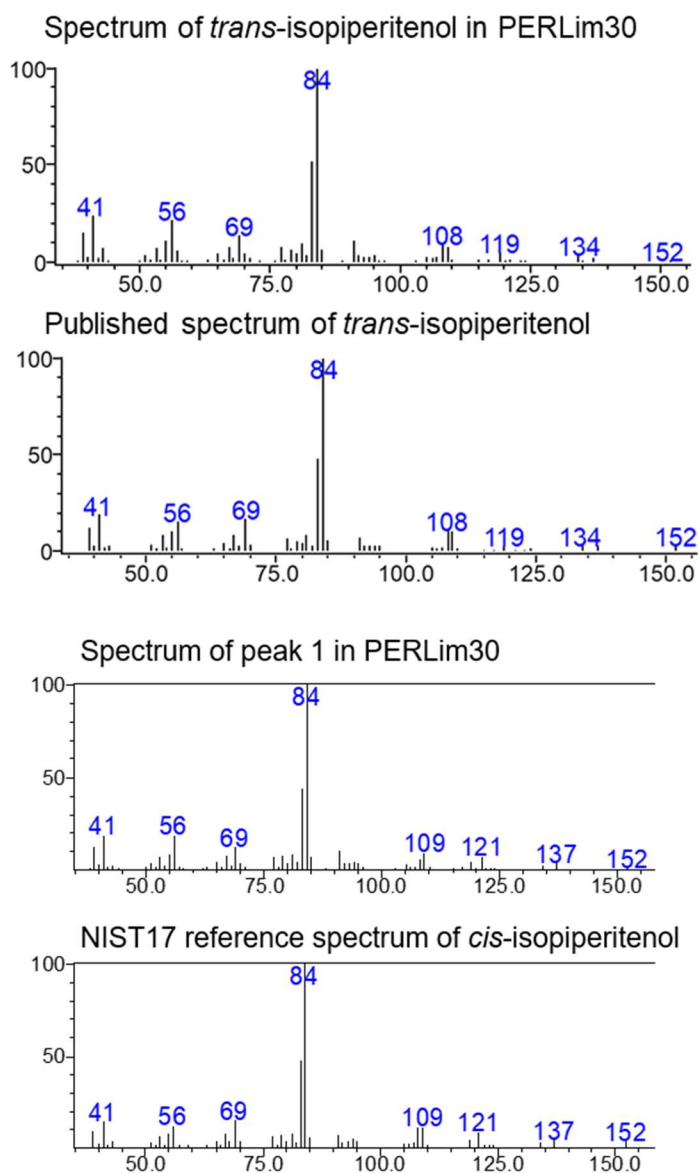

**Figure S3. Mass spectrum of *trans*-isopiperitenol and peak 1 produced by PERLim30 cells.** Mass spectra of the *trans*-isopiperitenol peak produced by strains PERLim30 and CYTLim06 was obtained by parallel GC-MS analysis of the same samples presented in **Fig. 5a** and identified by comparison to previously reported MS spectra for this molecule (1). Peak labelled 1 (**Fig. 5a**) was tentatively identified as *cis*-isopiperitenol based on its MS spectrum, similarity with available reference spectra, and in agreement with the published product specificity of *MsLimH* (2).

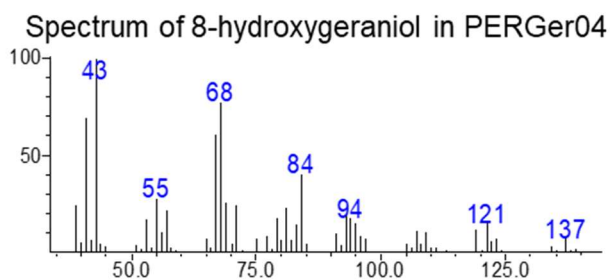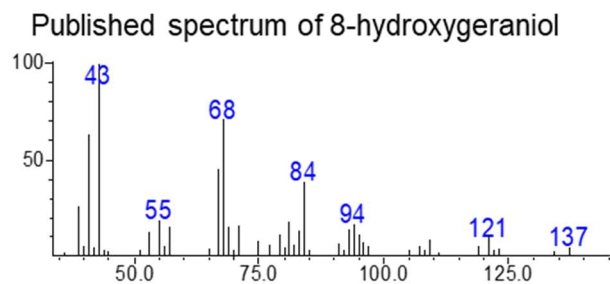

**Figure S4. Mass spectrum of the 8-hydroxygeraniol peak produced by PERGer04 cells.** Mass spectrum of the 8-hydroxygeraniol peak in sample PERGer04 was obtained by parallel GC-MS analysis of the same samples presented in **Fig. 5b** and confirmed by comparison to previously reported MS spectra for this molecule (3).



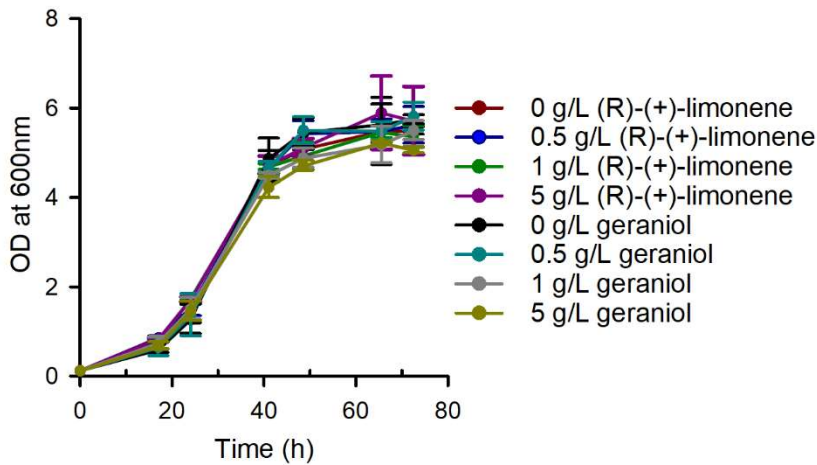

**Figure S5. Evaluation of product toxicity.** Compared optical density at 600 nm of batch cultures of strain EGY48 with increasing concentration of either (*R*)-(+)-limonene or geraniol added to the 10% IPM overlay to mimic the corresponding monoterpene level observed throughout the semi-continuous fed-batch cultivation of strains PERLim19 and PERGer02. Cultivation was performed in standard SD 2% (w/v) galactose/ 1% (w/v) raffinose media. Error bars correspond to the standard deviation around the mean (n=3, corresponding to three biological replicates).

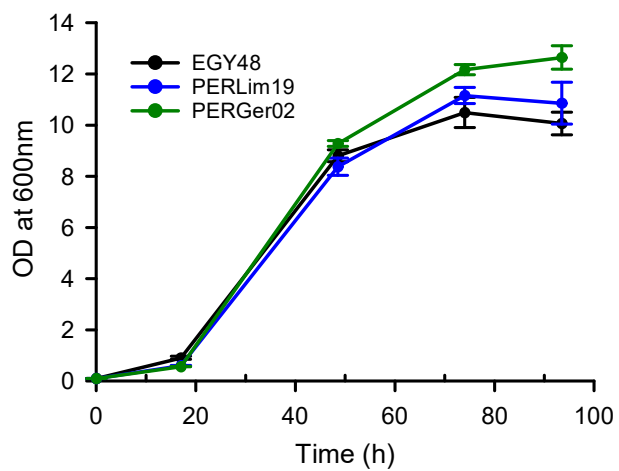

**Figure S6. Optical density at 600nm of batch cultures of strains EGY48, PERGer02 and PERLim19.** Cultures were grown in standard SD 2% (w/v) glucose media. Error bars correspond to the standard deviation around the mean (n=3, corresponding to three biological replicates).

**Supplementary Tables.**

**Table S1.** List of bacterial and yeast strains.

| Strain                             | Plasmid(s) present             | Genotype/Relevant characteristics                                                                                                                                                                                                                                                                                        | Source                                      |
|------------------------------------|--------------------------------|--------------------------------------------------------------------------------------------------------------------------------------------------------------------------------------------------------------------------------------------------------------------------------------------------------------------------|---------------------------------------------|
| <i>E. coli Mach1</i> <sup>TM</sup> | -                              | W ΔrecA1398 endA1 fhuA Φ80Δ(lac)M15 Δ(lac)X74 hsdR(rK-mK+)                                                                                                                                                                                                                                                               | Invitrogen (Now: Thermo Fischer Scientific) |
| EGY48                              | -                              | MATα, <i>ura3</i> , <i>his3</i> , <i>trp1</i> , 6xLexA operators::LEU2 - Derivative of strain W303-A1                                                                                                                                                                                                                    | References: (4-6)                           |
| EGY48Δgal80                        | -                              | EGY48 deleted for the <i>GAL80</i> gene                                                                                                                                                                                                                                                                                  | This study                                  |
| CYTlim01                           | pCYT08                         | EGY48 – 2μ; TRP1, HIS3; AmpR; P <sub>GALI</sub> -C/limS-tAHD1, LEU2, URA3                                                                                                                                                                                                                                                | This study                                  |
| CYTlim02                           | pCYT01, pCYT02, pCYT03, pCYT04 | EGY48–2μ; TRP1, AmpR; P <sub>GALI</sub> -EfmvaS-tAHD1; P <sub>GAL10</sub> -EfmvaE-tCYC1, HIS3; P <sub>GALI</sub> -ERG8-tAHD1; P <sub>GAL10</sub> -ERG12-tCYC1, LEU2; P <sub>GALI</sub> -IDI1-tAHD1; P <sub>GAL10</sub> -ERG19-tCYC1, URA3; P <sub>GALI</sub> -C/limS-tAHD1; P <sub>GAL10</sub> -ERG20(N127W)-tCYC1       | This study                                  |
| CYTlim02 Δgal80                    | pCYT01, pCYT02, pCYT03, pCYT04 | EGY48Δgal80–2μ; TRP1, AmpR; P <sub>GALI</sub> -EfmvaS-tAHD1; P <sub>GAL10</sub> -EfmvaE-tCYC1, HIS3; P <sub>GALI</sub> -ERG8-tAHD1; P <sub>GAL10</sub> -ERG12-tCYC1, LEU2; P <sub>GALI</sub> -IDI1-tAHD1; P <sub>GAL10</sub> -ERG19-tCYC1, URA3; P <sub>GALI</sub> -C/limS-tAHD1; P <sub>GAL10</sub> -ERG20(N127W)-tCYC1 | This study                                  |
| CYTlim03                           | pCYT10                         | EGY48–2μ; TRP1, HIS3, LEU2, P <sub>GALI</sub> -MsLimS-tAHD1; P <sub>GAL10</sub> -ERG20(N127W)-tCYC1                                                                                                                                                                                                                      | This study                                  |
| CYTlim04                           | pCYT01, pCYT02, pCYT03, pCYT10 | EGY48–2μ; TRP1, AmpR; P <sub>GALI</sub> -EfmvaS-tAHD1; P <sub>GAL10</sub> -EfmvaE-tCYC1, HIS3; P <sub>GALI</sub> -ERG8-tAHD1; P <sub>GAL10</sub> -ERG12-tCYC1, LEU2; P <sub>GALI</sub> -IDI1-tAHD1; P <sub>GAL10</sub> -ERG19-tCYC1, URA3; P <sub>GALI</sub> -MsLimS-tAHD1; P <sub>GAL10</sub> -ERG20(N127W)-tCYC1       | This study                                  |
| CYTlim05                           | -                              | EGY48 – P <sub>GALI</sub> -Efmva-tPGII, P <sub>GAL10</sub> -EfmvaE-tCYC1, P <sub>SED1</sub> -ERG12-tFBA1, P <sub>Tdh3</sub> -ERG8-tPRM8, P <sub>Fba1</sub> -ERG19-tSPG5, P <sub>Cww12</sub> -IDI1-tENO2, P <sub>Tef1</sub> -ERG20(N127W)-tTDH2, P <sub>Pgk1</sub> -MsLimS-tADH1.                                         | This study                                  |
| CYTlim06                           | pCYT01, pCYT02, pCYT10, pCYT11 | CYTlim05–2μ; TRP1, AmpR; P <sub>GALI</sub> -EfmvaS-tAHD1; P <sub>GAL10</sub> -EfmvaE-tCYC1, HIS3; P <sub>GALI</sub> -ERG8-tAHD1; P <sub>GAL10</sub> -ERG12-tCYC1, LEU2; P <sub>GALI</sub> -MsLimH-tAHD1; P <sub>GAL10</sub> -tC CPR-tCYC1, URA3;                                                                         | This study                                  |

|                            |                                |                                                                                                                                                                                                                                                                                                                   |            |
|----------------------------|--------------------------------|-------------------------------------------------------------------------------------------------------------------------------------------------------------------------------------------------------------------------------------------------------------------------------------------------------------------|------------|
|                            |                                | $P_{GALI}$ -MsLimS-tAHD1; $P_{GAL10}$ -ERG20(N127W)-tCYC1                                                                                                                                                                                                                                                         |            |
| PERLim01                   | pPER08                         | EGY48 – 2 $\mu$ ; TRP1, HIS3; AmpR; $P_{GALI}$ -C/LimS-SKL-tAHD1, LEU2, URA3                                                                                                                                                                                                                                      | This study |
| PERLim02                   | pCYT01, pCYT02, pCYT03, pPER04 | EGY48 – 2 $\mu$ ; TRP1; AmpR; $P_{GALI}$ -EfmvaS-tAHD1; $P_{GAL10}$ -EfmvaE-tCYC1, HIS3; $P_{GALI}$ -ERG8-tAHD1; $P_{GAL10}$ -ERG12-tCYC1, LEU2; $P_{GALI}$ -IDI1-tAHD1; $P_{GAL10}$ -ERG19-tCYC1, URA3; $P_{GALI}$ -C/LimS-SKL-tAHD1; $P_{GAL10}$ -ERG20(N127W)-SKL-tCYC1                                        | This study |
| PERLim03                   | pCYT01, pCYT02, pPER03, pPER04 | EGY48 – 2 $\mu$ ; TRP1; AmpR; $P_{GALI}$ -EfmvaS-tAHD1; $P_{GAL10}$ -EfmvaE-tCYC1, HIS3; $P_{GALI}$ -ERG8-tAHD1; $P_{GAL10}$ -ERG12-tCYC1, LEU2; $P_{GALI}$ -IDI1-SKL-tAHD1; $P_{GAL10}$ -ERG19-SKL-tCYC1, URA3; $P_{GALI}$ -C/LimS-SKL-tAHD1; $P_{GAL10}$ -ERG20(N127W)-SKL-tCYC1                                | This study |
| PERLim04                   | pCYT01, pPER02, pPER03, pPER04 | EGY48 – 2 $\mu$ ; TRP1; AmpR; $P_{GALI}$ -EfmvaS-tAHD1; $P_{GAL10}$ -EfmvaE-tCYC1, HIS3; $P_{GALI}$ -ERG8-SKL-tAHD1; $P_{GAL10}$ -ERG12-SKL-tCYC1, LEU2; $P_{GALI}$ -IDI1-SKL-tAHD1; $P_{GAL10}$ -ERG19-SKL-tCYC1, URA3; $P_{GALI}$ -C/LimS-SKL-tAHD1; $P_{GAL10}$ -ERG20(N127W)-SKL-tCYC1                        | This study |
| PERLim05                   | pPER01, pPER02, pPER03, pPER04 | EGY48 – 2 $\mu$ ; TRP1; AmpR; $P_{GALI}$ -EfmvaS-SKL-tAHD1; $P_{GAL10}$ -EfmvaE-SKL-tCYC1, HIS3; $P_{GALI}$ -ERG8-SKL-tAHD1; $P_{GAL10}$ -ERG12-SKL-tCYC1, LEU2; $P_{GALI}$ -IDI1-SKL-tAHD1; $P_{GAL10}$ -ERG19-SKL-tCYC1, URA3; $P_{GALI}$ -C/LimS-SKL-tAHD1; $P_{GAL10}$ -ERG20(N127W)-SKL-tCYC1                | This study |
| PERLim05<br>$\Delta$ gal80 | pPER01, pPER02, pPER03, pPER04 | EGY48 $\Delta$ gal80 – 2 $\mu$ ; TRP1; AmpR; $P_{GALI}$ -EfmvaS-SKL-tAHD1; $P_{GAL10}$ -EfmvaE-SKL-tCYC1, HIS3; $P_{GALI}$ -ERG8-SKL-tAHD1; $P_{GAL10}$ -ERG12-SKL-tCYC1, LEU2; $P_{GALI}$ -IDI1-SKL-tAHD1; $P_{GAL10}$ -ERG19-SKL-tCYC1, URA3; $P_{GALI}$ -C/LimS-SKL-tAHD1; $P_{GAL10}$ -ERG20(N127W)-SKL-tCYC1 | This study |
| PERLim06                   | pPER04                         | EGY48 – 2 $\mu$ ; TRP1, HIS3, LEU2, URA3; $P_{GALI}$ -C/LimS-SKL-tAHD1; $P_{GAL10}$ -ERG20(N127W)-SKL-tCYC1                                                                                                                                                                                                       | This study |
| PERLim07                   | pPER03, pPER04                 | EGY48 – 2 $\mu$ ; TRP1, HIS3, LEU2; $P_{GALI}$ -IDI1-SKL-tAHD1; $P_{GAL10}$ -ERG19-SKL-tCYC1, URA3; $P_{GALI}$ -C/LimS-SKL-tAHD1; $P_{GAL10}$ -ERG20(N127W)-SKL-tCYC1                                                                                                                                             | This study |
| PERLim08                   |                                | EGY48 – 2 $\mu$ ; TRP1, HIS3; $P_{GALI}$ -ERG8-SKL-tAHD1; $P_{GAL10}$ -ERG12-SKL-tCYC1, LEU2; $P_{GALI}$ -                                                                                                                                                                                                        | This study |

|          |                        |                                                                                                                                                                                                                                                                                                                   |            |
|----------|------------------------|-------------------------------------------------------------------------------------------------------------------------------------------------------------------------------------------------------------------------------------------------------------------------------------------------------------------|------------|
|          | pPER02, pPER03, pPER04 | IDI1-SKL-tAHD1; P <sub>GAL10</sub> -ERG19-SKL-tCYC1, URA3; P <sub>GAL1-C/LimS</sub> -SKL-tAHD1; P <sub>GAL10</sub> -ERG20(N127W)-SKL-tCYC1                                                                                                                                                                        |            |
| PERLim09 | -                      | EGY48 – P <sub>GAL1</sub> -EfmvaS-SKL-tPGI1, P <sub>GAL10</sub> -EfmvaE-SKL-tCYC1, P <sub>SED1</sub> -ERG12-SKL-tFBA1, P <sub>Tdh3</sub> -ERG8-SKL-tPRM8, P <sub>Fbal</sub> -ERG19-SKL-tSPG5, P <sub>Cww12</sub> -IDI1-SKL-tENO2, P <sub>Tef1</sub> -ERG20(N127W)-SKL-tTDH2, P <sub>Pgk1-C/LimS</sub> -SKL-tADH1. | This study |
| PERLim10 | pPER01                 | PERLim09 – 2μ; TRP1; AmpR; P <sub>GAL1</sub> -EfmvaS-SKL-tAHD1; P <sub>GAL10</sub> -EfmvaE-SKL-tCYC1, HIS3, LEU2, URA3                                                                                                                                                                                            | This study |
| PERLim11 | pPER02                 | PERLim09 – 2μ; TRP1, HIS3; AmpR; P <sub>GAL1</sub> -ERG8-SKL-tAHD1; P <sub>GAL10</sub> -ERG12-SKL-tCYC1, LEU2, URA3                                                                                                                                                                                               | This study |
| PERLim12 | pPER03                 | PERLim09 – 2μ; TRP1, HIS3, LEU2; AmpR; P <sub>GAL1</sub> -IDI1-SKL-tAHD1; P <sub>GAL10</sub> -ERG19-SKL-tCYC1, URA3                                                                                                                                                                                               | This study |
| PERLim13 | pPER04                 | PERLim09 – 2μ; TRP1, HIS3, LEU2, URA3; AmpR; P <sub>GAL1-C/LimS</sub> -SKL-tAHD1; P <sub>GAL10</sub> -ERG20(N127W)-SKL-tCYC1                                                                                                                                                                                      | This study |
| PERLim14 | pPER03, pPER04         | PERLim09 – 2μ; TRP1, HIS3, LEU2; AmpR; P <sub>GAL1</sub> -IDI1-SKL-tAHD1; P <sub>GAL10</sub> -ERG19-SKL-tCYC1, URA3; P <sub>GAL1-C/LimS</sub> -SKL-tAHD1; P <sub>GAL10</sub> -ERG20(N127W)-SKL-tCYC1                                                                                                              | This study |
| PERLim15 | pPER02, pPER04         | PERLim09 – 2μ; TRP1, HIS3; AmpR; P <sub>GAL1</sub> -ERG8-SKL-tAHD1; P <sub>GAL10</sub> -ERG12-SKL-tCYC1, LEU2, URA3; P <sub>GAL1-C/LimS</sub> -SKL-tAHD1; P <sub>GAL10</sub> -ERG20(N127W)-SKL-tCYC1                                                                                                              | This study |
| PERLim16 | pPER01, pPER04         | PERLim09 – 2μ; TRP1; AmpR; P <sub>GAL1</sub> -EfmvaS-SKL-tAHD1; P <sub>GAL10</sub> -EfmvaE-SKL-tCYC1, HIS3, LEU2, URA3; P <sub>GAL1-C/LimS</sub> -SKL-tAHD1; P <sub>GAL10</sub> -ERG20(N127W)-SKL-tCYC1                                                                                                           | This study |
| PERLim17 | pPER02, pPER03, pPER04 | PERLim09 – 2μ; TRP1, HIS3; AmpR; P <sub>GAL1</sub> -ERG8-SKL-tAHD1; P <sub>GAL10</sub> -ERG12-SKL-tCYC1, LEU2; P <sub>GAL1</sub> -IDI1-SKL-tAHD1; P <sub>GAL10</sub> -ERG19-SKL-tCYC1, URA3; P <sub>GAL1-C/LimS</sub> -SKL-tAHD1; P <sub>GAL10</sub> -ERG20(N127W)-SKL-tCYC1                                      | This study |
| PERLim18 | pPER01, pPER03, pPER04 | PERLim09 – 2μ; TRP1; AmpR; P <sub>GAL1</sub> -EfmvaS-SKL-tAHD1; P <sub>GAL10</sub> -EfmvaE-SKL-tCYC1, HIS3, LEU2; P <sub>GAL1</sub> -IDI1-SKL-tAHD1; P <sub>GAL10</sub> -ERG19-SKL-tCYC1,                                                                                                                         | This study |

|          |                                |                                                                                                                                                                                                                                                                                                                                                         |            |
|----------|--------------------------------|---------------------------------------------------------------------------------------------------------------------------------------------------------------------------------------------------------------------------------------------------------------------------------------------------------------------------------------------------------|------------|
|          |                                | URA3; P <sub>GALI</sub> -C/LimS-SKL-tAHD1; P <sub>GAL10</sub> -ERG20(N127W)-SKL-tCYC1                                                                                                                                                                                                                                                                   |            |
| PERLim19 | pPER01, pPER02, pPER03, pPER04 | PERLim09 – 2μ; TRP1; AmpR; P <sub>GALI</sub> -EfmvaS-SKL-tAHD1; P <sub>GAL10</sub> -EfmvaE-SKL-tCYC1, HIS3; P <sub>GALI</sub> -ERG8-SKL-tAHD1; P <sub>GAL10</sub> -ERG12-SKL-tCYC1, LEU2; P <sub>GALI</sub> -IDI1-SKL-tAHD1; P <sub>GAL10</sub> -ERG19-SKL-tCYC1, URA3; P <sub>GALI</sub> -C/LimS-SKL-tAHD1; P <sub>GAL10</sub> -ERG20(N127W)-SKL-tCYC1 | This study |
| PERLim20 | pPER08                         | PERLim09 – 2μ; TRP1, HIS3, LEU2, URA3; AmpR; P <sub>GALI</sub> -C/LimS-SKL-tAHD1                                                                                                                                                                                                                                                                        | This study |
| PERLim21 | pPER11                         | PERLim09 – 2μ; TRP1, HIS3, LEU2; AmpR; P <sub>GALI</sub> -ERG20(N127W)-SKL-tAHD1, URA3                                                                                                                                                                                                                                                                  | This study |
| PERLim22 | pPER04, pPER09                 | PERLim09 – 2μ; TRP1, URA3; AmpR; P <sub>GALI</sub> -C/LimS-SKL-tAHD1; P <sub>GAL10</sub> -ERG20(N127W)-SKL-tCYC1, HIS3; AmpR; P <sub>GALI</sub> -ERG8-SKL-tAHD1, LEU2                                                                                                                                                                                   | This study |
| PERLim23 | pPER04, pPER10                 | PERLim09 – 2μ; TRP1, URA3; AmpR; P <sub>GALI</sub> -C/LimS-SKL-tAHD1; P <sub>GAL10</sub> -ERG20(N127W)-SKL-tCYC1, HIS3; AmpR; P <sub>GALI</sub> -ERG12-SKL-tAHD1, LEU2                                                                                                                                                                                  | This study |
| PERLim24 | pPER02, pPER08                 | PERLim09 – 2μ; TRP1, HIS3; AmpR; P <sub>GALI</sub> -ERG8-SKL-tAHD1; P <sub>GAL10</sub> -ERG12-SKL-tCYC1, LEU2, URA3; AmpR; P <sub>GALI</sub> -C/LimS-SKL-tAHD1                                                                                                                                                                                          | This study |
| PERLim25 | pPER02, pPER11                 | PERLim09 – 2μ; TRP1, HIS3; AmpR; P <sub>GALI</sub> -ERG8-SKL-tAHD1; P <sub>GAL10</sub> -ERG12-SKL-tCYC1, LEU2; AmpR; P <sub>GALI</sub> -ERG20(N127W)-SKL-tAHD1, URA3                                                                                                                                                                                    | This study |
| PERLim26 | pPER14                         | EGY48–2μ; TRP1, HIS3, LEU2, P <sub>GALI</sub> -MsLimS-SKL-tAHD1; P <sub>GAL10</sub> -ERG20(N127W)-SKL-tCYC1                                                                                                                                                                                                                                             | This study |
| PERLim27 | pPER01, pPER02, pPER03, pPER14 | EGY48–2μ; TRP1, AmpR; P <sub>GALI</sub> -EfmvaS-SKL-tAHD1; P <sub>GAL10</sub> -EfmvaE-SKL-tCYC1, HIS3; P <sub>GALI</sub> -ERG8-SKL-tAHD1; P <sub>GAL10</sub> -ERG12-SKL-tCYC1, LEU2; P <sub>GALI</sub> -IDI1-SKL-tAHD1; P <sub>GAL10</sub> -ERG19-SKL-tCYC1, URA3; P <sub>GALI</sub> -MsLimS-SKL-tAHD1; P <sub>GAL10</sub> -ERG20(N127W)-SKL-tCYC1      | This study |
| PERLim28 |                                | EGY48 – P <sub>GALI</sub> -Efmva-SKL-tPGI1, P <sub>GAL10</sub> -EfmvaE-SKL-tCYC1, P <sub>SED1</sub> -ERG12-SKL-tFBA1, P <sub>Tdh3</sub> -                                                                                                                                                                                                               | This study |

|          |                                 |                                                                                                                                                                                                                                                                                                                                                 |            |
|----------|---------------------------------|-------------------------------------------------------------------------------------------------------------------------------------------------------------------------------------------------------------------------------------------------------------------------------------------------------------------------------------------------|------------|
|          | -                               | ERG8-SKL-tPRM8, P <sub>Fbal</sub> -ERG19-SKL-tSPG5, P <sub>Cww12</sub> -IDI1-SKL-tENO2, P <sub>Tef1</sub> -ERG20(N127W)-SKL-tTDH2, P <sub>Pgk1</sub> -MsLimS-SKL-tADH1.                                                                                                                                                                         |            |
| PERLim29 | pPER01, pPER02, pCfB220, pPER14 | PERLim28-2μ; TRP1, AmpR; P <sub>GALI</sub> -EfmvaS-SKL-tAHD1; P <sub>GAL10</sub> -EfmvaE-SKL-tCYC1, HIS3; P <sub>GALI</sub> -ERG8-SKL-tAHD1; P <sub>GAL10</sub> -ERG12-SKL-tCYC1, LEU2, URA3; P <sub>GALI</sub> -MsLimS-SKL-tAHD1; P <sub>GAL10</sub> -ERG20(N127W)-SKL-tCYC1                                                                   | This study |
| PERLim30 | pPER01, pPER02, pCYT11, pPER14  | PERLim28-2μ; TRP1, AmpR; P <sub>GALI</sub> -EfmvaS-SKL-tAHD1; P <sub>GAL10</sub> -EfmvaE-SKL-tCYC1, HIS3; P <sub>GALI</sub> -ERG8-SKL-tAHD1; P <sub>GAL10</sub> -ERG12-SKL-tCYC1, LEU2; P <sub>GALI</sub> -MsLimH-tAHD1; P <sub>GAL10</sub> -tcCPR-tCYC1, URA3; P <sub>GALI</sub> -MsLimS-SKL-tAHD1; P <sub>GAL10</sub> -ERG20(N127W)-SKL-tCYC1 | This study |
| CYTCam01 | pCYT07                          | EGY48 - 2μ; TRP1, HIS3, LEU2, URA3; AmpR; P <sub>GALI</sub> -SeCamS -tAHD1; P <sub>GAL10</sub> -ERG20(N127W)-tCYC1                                                                                                                                                                                                                              | This study |
| CYTPin01 | pCYT05                          | EGY48 - 2μ; TRP1, HIS3, LEU2, URA3; AmpR P <sub>GALI</sub> -PtPinS-tAHD1; P <sub>GAL10</sub> -ERG20(N127W)-tCYC1                                                                                                                                                                                                                                | This study |
| CYTSab01 | pCYT06                          | EGY48 - 2μ; TRP1, HIS3, LEU2, URA3; AmpR P <sub>GALI</sub> -SpSabS-tAHD1; P <sub>GAL10</sub> -ERG20(N127W)-tCYC1                                                                                                                                                                                                                                | This study |
| CYTCam02 | pCYT01, pCYT02, pCYT03, pCYT07  | EGY48 - 2μ; TRP1; AmpR; P <sub>GALI</sub> -EfmvaS-tAHD1; P <sub>GAL10</sub> -EfmvaE-tCYC1, HIS3; P <sub>GALI</sub> -ERG8-tAHD1; P <sub>GAL10</sub> -ERG12-tCYC1, LEU2; P <sub>GALI</sub> -IDI1-tAHD1; P <sub>GAL10</sub> -ERG19-tCYC1, URA3; AmpR; P <sub>GALI</sub> -SeCamS -tAHD1; P <sub>GAL10</sub> -ERG20(N127W)-tCYC1                     | This study |
| CYTPin02 | pCYT01, pCYT02, pCYT03, pCYT05  | EGY48 - 2μ; TRP1; AmpR; P <sub>GALI</sub> -EfmvaS-tAHD1; P <sub>GAL10</sub> -EfmvaE-tCYC1, HIS3; P <sub>GALI</sub> -ERG8-tAHD1; P <sub>GAL10</sub> -ERG12-tCYC1, LEU2; P <sub>GALI</sub> -IDI1-tAHD1; P <sub>GAL10</sub> -ERG19-tCYC1, URA3; AmpR P <sub>GALI</sub> -PtPinS-tAHD1; P <sub>GAL10</sub> -ERG20(N127W)-tCYC1                       | This study |
| CYTSab02 | pCYT01, pCYT02, pCYT03, pCYT06  | EGY48 - 2μ; TRP1; AmpR; P <sub>GALI</sub> -EfmvaS-tAHD1; P <sub>GAL10</sub> -EfmvaE-tCYC1, HIS3; P <sub>GALI</sub> -ERG8-tAHD1; P <sub>GAL10</sub> -ERG12-tCYC1, LEU2; P <sub>GALI</sub> -IDI1-tAHD1; P <sub>GAL10</sub> -ERG19-tCYC1, URA3; AmpR P <sub>GALI</sub> -SpSabS-tAHD1; P <sub>GAL10</sub> -ERG20(N127W)-tCYC1                       | This study |
| PERCam01 | pPER07                          | EGY48 - 2μ; TRP1, HIS3, LEU2, URA3; AmpR; P <sub>GALI</sub> -SeCamS-SKL-tAHD1; P <sub>GAL10</sub> -ERG20(N127W)-SKL-tCYC1                                                                                                                                                                                                                       | This study |

|          |                                 |                                                                                                                                                                                                                                                                                                                                                            |            |
|----------|---------------------------------|------------------------------------------------------------------------------------------------------------------------------------------------------------------------------------------------------------------------------------------------------------------------------------------------------------------------------------------------------------|------------|
| PERPin01 | pPER05                          | EGY48 – 2μ; TRP1, HIS3, LEU2, URA3; AmpR; P <sub>GALI</sub> -PtPinS-SKL-tAHD1; P <sub>GAL10</sub> -ERG20(N127W)-SKL-tCYC1                                                                                                                                                                                                                                  | This study |
| PERSab01 | pPER06                          | EGY48 – 2μ; TRP1, HIS3, LEU2, URA3; AmpR; P <sub>GALI</sub> -SpSabS-SKL-tAHD1; P <sub>GAL10</sub> -ERG20(N127W)-SKL-tCYC1                                                                                                                                                                                                                                  | This study |
| PERCam02 | pPER01, pPER02, pPER03, pPER07  | EGY48 – 2μ; TRP1; AmpR; P <sub>GALI</sub> -EfmvaS-SKL-tAHD1; P <sub>GAL10</sub> -EfmvaE-SKL-tCYC1, HIS3; P <sub>GALI</sub> -ERG8-SKL-tAHD1; P <sub>GAL10</sub> -ERG12-SKL-tCYC1, LEU2; P <sub>GALI</sub> -IDI1-SKL-tAHD1; P <sub>GAL10</sub> -ERG19-SKL-tCYC1, URA3; AmpR; P <sub>GALI</sub> -SeCamS-SKL-tAHD1; P <sub>GAL10</sub> -ERG20(N127W)-SKL-tCYC1 | This study |
| PERPin02 | pPER01, pPER02, pPER03, pPER05  | EGY48 – 2μ; TRP1; AmpR; P <sub>GALI</sub> -EfmvaS-SKL-tAHD1; P <sub>GAL10</sub> -EfmvaE-SKL-tCYC1, HIS3; P <sub>GALI</sub> -ERG8-SKL-tAHD1; P <sub>GAL10</sub> -ERG12-SKL-tCYC1, LEU2; P <sub>GALI</sub> -IDI1-SKL-tAHD1; P <sub>GAL10</sub> -ERG19-SKL-tCYC1, URA3; AmpR; P <sub>GALI</sub> -PtPinS-SKL-tAHD1; P <sub>GAL10</sub> -ERG20(N127W)-SKL-tCYC1 | This study |
| PERSab02 | pPER01, pPER02, pPER03, pPER06  | EGY48 – 2μ; TRP1; AmpR; P <sub>GALI</sub> -EfmvaS-SKL-tAHD1; P <sub>GAL10</sub> -EfmvaE-SKL-tCYC1, HIS3; P <sub>GALI</sub> -ERG8-SKL-tAHD1; P <sub>GAL10</sub> -ERG12-SKL-tCYC1, LEU2; P <sub>GALI</sub> -IDI1-SKL-tAHD1; P <sub>GAL10</sub> -ERG19-SKL-tCYC1, URA3; AmpR; P <sub>GALI</sub> -SpSabS-SKL-tAHD1; P <sub>GAL10</sub> -ERG20(N127W)-SKL-tCYC1 | This study |
| PERGer01 | -                               | EGY48 – P <sub>GALI</sub> -Efmva-SKL-tPGI1, P <sub>GAL10</sub> -EfmvaE-SKL-tCYC1, P <sub>SED1</sub> -ERG12-SKL-tFBA1, P <sub>Tdh3</sub> -ERG8-SKL-tPRM8, P <sub>Fba1</sub> -ERG19-SKL-tSPG5, P <sub>Cww12</sub> -IDI1-SKL-tENO2, P <sub>Tef1</sub> -ERG20(N127W)-SKL-tTDH2, P <sub>Pgk1</sub> -ObGerS-SKL-tADH1.                                           | This study |
| PERGer02 | pPER01, pPER02, pPER03, pPER13  | PERGer01 – 2μ; TRP1; AmpR; P <sub>GALI</sub> -EfmvaS-SKL-tAHD1; P <sub>GAL10</sub> -EfmvaE-SKL-tCYC1, HIS3; P <sub>GALI</sub> -ERG8-SKL-tAHD1; P <sub>GAL10</sub> -ERG12-SKL-tCYC1, LEU2; P <sub>GALI</sub> -IDI1-SKL-tAHD1; P <sub>GAL10</sub> -ERG19-SKL-tCYC1, URA3; P <sub>GALI</sub> -ObGerS-SKL-tAHD1                                                | This study |
| PERGer03 | pPER01, pPER02, pCfB220, pPER13 | PERGer01 – 2μ; TRP1; AmpR; P <sub>GALI</sub> -EfmvaS-SKL-tAHD1; P <sub>GAL10</sub> -EfmvaE-SKL-tCYC1, HIS3; P <sub>GALI</sub> -ERG8-SKL-tAHD1; P <sub>GAL10</sub> -ERG12-SKL-tCYC1, LEU2, URA3; P <sub>GALI</sub> -ObGerS-SKL-tAHD1                                                                                                                        | This study |
| PERGer04 | pPER01, pPER02, pCYT12, pPER13  | PERGer01 – 2μ; TRP1; AmpR; P <sub>GALI</sub> -EfmvaS-SKL-tAHD1; P <sub>GAL10</sub> -EfmvaE-SKL-tCYC1, HIS3; P <sub>GALI</sub> -ERG8-SKL-tAHD1; P <sub>GAL10</sub> -ERG12-SKL-tCYC1, LEU2; P <sub>GALI</sub> -crG8OH-tAHD1; P <sub>GAL10</sub> -crCPR-tCYC1, URA3; P <sub>GALI</sub> -ObGerS-SKL-tAHD1                                                      | This study |



|          |                                   |                                                                                                                                                                                                                                                                                                                                                     |            |
|----------|-----------------------------------|-----------------------------------------------------------------------------------------------------------------------------------------------------------------------------------------------------------------------------------------------------------------------------------------------------------------------------------------------------|------------|
|          |                                   |                                                                                                                                                                                                                                                                                                                                                     |            |
| PERMva01 | pPER01, pPER02,<br>pPER03         | EGY48 – 2μ; TRP1; AmpR; P <sub>GALI</sub> -EfmvaS-SKL-tAHD1; P <sub>GAL10</sub> -EfmvaE-SKL-tCYC1, HIS3; P <sub>GALI</sub> -ERG8-SKL-tAHD1; P <sub>GAL10</sub> -ERG12-SKL-tCYC1, LEU2; P <sub>GALI</sub> -IDI1-SKL-tAHD1; P <sub>GAL10</sub> -ERG19-SKL-tCYC1, URA3                                                                                 | This study |
| PERCan01 | pPER15                            | EGY48 – 2μ; TRP1, HIS3, LEU2, URA3; P <sub>GALI</sub> -CsPT4-SKL-tAHD1; P <sub>GAL10</sub> -ERG20(N127W)-SKL-tCYC1                                                                                                                                                                                                                                  | This study |
| PERCan02 | pPER01, pPER02,<br>pPER03, pPER15 | EGY48 – 2μ; TRP1; AmpR; P <sub>GALI</sub> -EfmvaS-SKL-tAHD1; P <sub>GAL10</sub> -EfmvaE-SKL-tCYC1, HIS3; P <sub>GALI</sub> -ERG8-SKL-tAHD1; P <sub>GAL10</sub> -ERG12-SKL-tCYC1, LEU2; P <sub>GALI</sub> -IDI1-SKL-tAHD1; P <sub>GAL10</sub> -ERG19-SKL-tCYC1, URA3; P <sub>GALI</sub> -CsPT4-SKL-tAHD1; P <sub>GAL10</sub> -ERG20(N127W)-SKL-tCYC1 | This study |
| PERGFP   | pPERGFP                           | EGY48 – 2μ; TRP1, HIS3, LEU2, URA3; P <sub>GALI</sub> -GFP-SKL-tAHD1                                                                                                                                                                                                                                                                                | This study |

**Table S2.** Comparison of (*R*)-(+)-limonene titers between cytosolic and peroxisomal production in different strains.

| <b>Strain</b> | <b>(<i>R</i>)-(+)-limonene<br/>titer (mg/L)</b> |
|---------------|-------------------------------------------------|
| CYTLim01      | 0.32 ± 0.01                                     |
| CYTLim02      | 1.13 ± 0.05                                     |
| PERLim01      | 0.41 ± 0.06                                     |
| PERLim02      | 35.68 ± 4.37                                    |
| PERLim03      | 43.25 ± 5.73                                    |
| PERLim04      | 38.20 ± 0.60                                    |
| PERLim05      | 141.46 ± 21.50                                  |
| PERLim06      | 3.75 ± 0.47                                     |
| PERLim07      | 6.30 ± 0.41                                     |
| PERLim08      | 5.79 ± 0.15                                     |

Errors correspond to the standard deviation of the mean (n=3, corresponding to three biological replicates).

**Table S3.** Determining the limiting steps in the peroxisomal pathway. Titters of (*R*)-(+)-limonene obtained in different strains.

| <b>Strain</b> | <b>(<i>R</i>)-(+)-limonene<br/>titer (mg/L)</b> |
|---------------|-------------------------------------------------|
| PERLim09      | 4.24 ± 1.67                                     |
| PERLim10      | 1.96 ± 0.03                                     |
| PERLim11      | 3.59 ± 0.04                                     |
| PERLim12      | 2.41 ± 0.06                                     |
| PERLim13      | 65.79 ± 5.50                                    |
| PERLim14      | 71.80 ± 8.03                                    |
| PERLim15      | 114.11 ± 5.50                                   |
| PERLim16      | 60.31 ± 1.94                                    |
| PERLim17      | 106.11 ± 5.41                                   |
| PERLim18      | 135.50 ± 12.38                                  |
| PERLim19      | 165.89 ± 7.95                                   |
| PERLim20      | 32.36 ± 2.08                                    |
| PERLim21      | 4.46 ± 0.32                                     |
| PERLim22      | 27.92 ± 4.75                                    |
| PERLim23      | 116.41 ± 13.74                                  |
| PERLim24      | 32.53 ± 3.57                                    |
| PERLim25      | 10.74 ± 2.16                                    |

Errors correspond to the standard deviation of the mean (n=3, corresponding to three biological replicates).

**Table S4.** Peroxisomal compartmentalization is a general strategy for monoterpene production in yeast. Titers of monoterpene obtained in different strains and fold improvement compared to cytosolic production.

| <b>Monoterpene</b>       | <b>Strain</b> | <b>Monoterpene titer (mg/L)</b> | <b>Fold improvement</b> |
|--------------------------|---------------|---------------------------------|-------------------------|
| camphene                 | CYTCam02      | 0.39 ± 0.09                     |                         |
|                          | PERCam02      | 5.77 ± 1.10                     | 15                      |
| sabinene                 | CYTSab02      | 1.48 ± 0.17                     |                         |
|                          | PERSab02      | 32.32 ± 5.10                    | 22                      |
| $\alpha$ -pinene         | CYTPin02      | 0.66 ± 0.02                     |                         |
|                          | PERPin02      | 69.22 ± 11.01                   | 105                     |
| <i>(S)</i> -(-)-limonene | CYTLim04      | 3.07 ± 0.49                     |                         |
|                          | PERLim27      | 51.98 ± 1.29                    | 17                      |
| <i>(R)</i> -(+)-limonene | CYTLim02      | 1.13 ± 0.05                     |                         |
|                          | PERLim05      | 141.46 ± 21.50                  | 125                     |

Errors correspond to the standard deviation of the mean (n=2, corresponding to two biological replicates).

**Table S5.** List of episomal plasmids.

| <b>Episomal plasmid</b> | <b>Relevant characteristics</b>                                                                 | <b>Source</b>         |
|-------------------------|-------------------------------------------------------------------------------------------------|-----------------------|
| pCfB132                 | pESC-URA-USER                                                                                   | Irina Borodina<br>(7) |
| pCfB291                 | pESC-HIS-USER                                                                                   | Irina Borodina<br>(7) |
| pCfB220                 | pESC-LEU-USER                                                                                   | Irina Borodina<br>(7) |
| pWUS                    | pESC-TRP-USER                                                                                   | This study            |
| pCYT01                  | 2 $\mu$ ; TRP1; AmpR; P <sub>GALI</sub> -EfmvaS-tAHD1; P <sub>GAL10</sub> -EfmvaE-tCYC1         | This study            |
| pCYT02                  | 2 $\mu$ ; HIS3; AmpR; P <sub>GALI</sub> -ERG8-tAHD1; P <sub>GAL10</sub> -ERG12-tCYC1            | This study            |
| pCYT03                  | 2 $\mu$ ; LEU2; AmpR; P <sub>GALI</sub> -IDI1-tAHD1; P <sub>GAL10</sub> -ERG19-tCYC1            | This study            |
| pCYT04                  | 2 $\mu$ ; URA3; AmpR; P <sub>GALI</sub> -C/LimS-tAHD1; P <sub>GAL10</sub> -ERG20(N127W)-tCYC1   | This study            |
| pCYT05                  | 2 $\mu$ ; URA3; AmpR P <sub>GALI</sub> -PtPinS-tAHD1; P <sub>GAL10</sub> -ERG20(N127W)-tCYC1    | This study            |
| pCYT06                  | 2 $\mu$ ; URA3; AmpR P <sub>GALI</sub> -SpSabS-tAHD1; P <sub>GAL10</sub> -ERG20(N127W)-tCYC1    | This study            |
| pCYT07                  | 2 $\mu$ ; URA3; AmpR; P <sub>GALI</sub> -SeCamS -tAHD1; P <sub>GAL10</sub> -ERG20(N127W)-tCYC1  | This study            |
| pCYT08                  | 2 $\mu$ ; HIS3; AmpR; P <sub>GALI</sub> -C/LimS-tAHD1                                           | This study            |
| pCYT09                  | 2 $\mu$ ; TRP1; AmpR; P <sub>GALI</sub> -LimH-tAHD1; P <sub>GAL10</sub> -tcCPR-tCYC1            | This study            |
| pCYT10                  | 2 $\mu$ ; URA3; AmpR; P <sub>GALI</sub> -MsLimS-tAHD1; P <sub>GAL10</sub> -ERG20(N127W)-tCYC1   | This study            |
| pCYT11                  | 2 $\mu$ ; LEU2; AmpR; P <sub>GALI</sub> -MsLimH-tAHD1; P <sub>GAL10</sub> -tcCPR-tCYC1          | This study            |
| pCYT12                  | 2 $\mu$ ; LEU2; AmpR; P <sub>GALI</sub> -crG8OH-tAHD1; P <sub>GAL10</sub> -crCPR-tCYC1          | This study            |
| pPER01                  | 2 $\mu$ ; TRP1; AmpR; P <sub>GALI</sub> -EfmvaS-SKL-tAHD1; P <sub>GAL10</sub> -EfmvaE-SKL-tCYC1 | This study            |
| pPER02                  | 2 $\mu$ ; HIS3; AmpR; P <sub>GALI</sub> -ERG8-SKL-tAHD1; P <sub>GAL10</sub> -ERG12-SKL-tCYC1    | This study            |
| pPER03                  | 2 $\mu$ ; LEU2; AmpR; P <sub>GALI</sub> -IDI1-SKL-tAHD1; P <sub>GAL10</sub> -ERG19-SKL-tCYC1    | This study            |

|         |                                                                                                       |            |
|---------|-------------------------------------------------------------------------------------------------------|------------|
| pPER04  | 2 $\mu$ ; URA3; AmpR; P <sub>GALI</sub> -C/LimS-SKL-tAHD1; P <sub>GAL10</sub> -ERG20(N127W)-SKL-tCYC1 | This study |
| pPER05  | 2 $\mu$ ; URA3; AmpR; P <sub>GALI</sub> -PtPinS-SKL-tAHD1; P <sub>GAL10</sub> -ERG20(N127W)-SKL-tCYC1 | This study |
| pPER06  | 2 $\mu$ ; URA3; AmpR; P <sub>GALI</sub> -SpSabS-SKL-tAHD1; P <sub>GAL10</sub> -ERG20(N127W)-SKL-tCYC1 | This study |
| pPER07  | 2 $\mu$ ; URA3; AmpR; P <sub>GALI</sub> -SeCamS-SKL-tAHD1; P <sub>GAL10</sub> -ERG20(N127W)-SKL-tCYC1 | This study |
| pPER08  | 2 $\mu$ ; URA3; AmpR; P <sub>GALI</sub> -C/LimS-SKL-tAHD1                                             | This study |
| pPER09  | 2 $\mu$ ; HIS3; AmpR; P <sub>GALI</sub> -ERG8-SKL-tAHD1                                               | This study |
| pPER10  | 2 $\mu$ ; HIS3; AmpR; P <sub>GALI</sub> -ERG12-SKL-tAHD1                                              | This study |
| pPER11  | 2 $\mu$ ; LEU2; AmpR; P <sub>GALI</sub> -ERG20(N127W)-SKL-tAHD1                                       | This study |
| pPER12  | 2 $\mu$ ; LEU2; AmpR; P <sub>GALI</sub> -C/LimS-SKL-tAHD1                                             | This study |
| pPER13  | 2 $\mu$ ; URA3; AmpR; P <sub>GALI</sub> -ObGerS-SKL-tAHD1; P <sub>GAL10</sub> -ERG20(N127W)-SKL-tCYC1 | This study |
| pPER14  | 2 $\mu$ ; URA3; AmpR; P <sub>GALI</sub> -MsLimS-SKL-tAHD1; P <sub>GAL10</sub> -ERG20(N127W)-SKL-tCYC1 | This study |
| pPER15  | 2 $\mu$ ; URA3; AmpR; P <sub>GALI</sub> -CsPT4-SKL-tAHD1; P <sub>GAL10</sub> -ERG20(N127W)-SKL-tCYC1  | This study |
| pPERGFP | 2 $\mu$ ; URA3; AmpR; P <sub>GALI</sub> -GFP-SKL-tAHD1                                                | This study |

**Table S6.** List of integrative plasmids.

| <b>Integrative plasmid</b> | <b>Relevant characteristics</b>                                                                        | <b>Source</b>                |
|----------------------------|--------------------------------------------------------------------------------------------------------|------------------------------|
| pAS1_X-3                   | AmpR; X3-DOWN -DR-URA3-DR-tCYC1-USER cassette* – tPGI1-tFBA1                                           | Victor Forman, (unpublished) |
| pAS2A                      | AmpR; tPGI1-tFBA1-USER cassette* – tPRM9-tSPG5                                                         | Victor Forman, (unpublished) |
| pAS2B                      | AmpR; tPRM9-tSPG5-USER cassette* – tCPS1-tPRM5                                                         | Victor Forman, (unpublished) |
| pAS2C                      | AmpR; tCPS1-tPRM5-USER cassette* - tENO2-tTDH2                                                         | Victor Forman, (unpublished) |
| pAS3_X-3                   | AmpR; tENO2-tTDH2-USER cassette* – tADH1- X3-UP                                                        | Victor Forman, (unpublished) |
| pAS_Δgal80                 | AmpR; gal80-UP -DR-URA3-DR-gal80-DOWN                                                                  | This study                   |
| pIntPER1                   | AmpR; <i>URA3</i> ; P <sub>GALI</sub> -EfmvaS-SKL-tPGI1; P <sub>GAL10</sub> -EfmvaE-SKL-tCYC1; X3-DOWN | This study                   |
| pIntPER2                   | AmpR; P <sub>THD3</sub> -ERG8-SKL-tPRM8; P <sub>SEDI</sub> -ERG12-SKL-tFBA1                            | This study                   |
| pIntPER3                   | AmpR; P <sub>FBA1</sub> -ERG19-SKL-tSPG5                                                               | This study                   |
| pIntPER4                   | AmpR; P <sub>CCW12</sub> -IDI1-SKL-tENO2                                                               | This study                   |
| pIntPER5                   | AmpR; P <sub>PGK1</sub> -C <i>LimS</i> -SKL-tTDH2; P <sub>TEF1</sub> -ERG20(N127W)-SKL-tADH1; X3-UP    | This study                   |
| pIntPER6                   | AmpR; P <sub>PGK1</sub> -Ob <i>GerS</i> -SKL-tTDH2; P <sub>TEF1</sub> -ERG20(N127W)-SKL-tADH1; X3-UP   | This study                   |
| pIntPER7                   | AmpR; P <sub>PGK1</sub> -Ms <i>LimS</i> -SKL-tTDH2; P <sub>TEF1</sub> -ERG20(N127W)-SKL-tADH1; X3-UP   |                              |

\*: USER cassette is constituted of one *AsiSI* restriction site flanked with two *Nb.BsmI* nicking sites.

**Table S7.** List of primers used in this study.

| <b>Primer</b> | <b>Sequence (5'-3')</b>                             |
|---------------|-----------------------------------------------------|
| GAL1-FP       | ACGTATCGCUTTTCAAAAATTCTTACTTTTTTTTTGGAT             |
| GAL1-RP       | ACCCGTTGAUGGGTTTTTCTCCTTGACGTTAAAG                  |
| GAL10-RP      | ACCCGTTGAUGGGTTTTTCTCCTTGACGTTAAAGTATA              |
| EfmvaS-FP     | ATCAACGGGUAAAATGACCATCGGTATTGACAAAATCTCC            |
| EfmvaS-RP     | CGTGCGAUTTAATTTCTGTATGATCTAACTGTGTTATTG             |
| EfmvaS-SKL-RP | CGTGCGAUTTACAGCTTGAATTTCTGTATGATCTAACTGTGTTATTGATAG |
| EfmvaE-FP     | AGCGATACGUAAAATGAAGACTGTAGTAATAATAGACG              |
| EfmvaE-RP     | CACGCGAUTTATTGTTTTCTCAAATCGTTCAAAATTG               |
| EfmvaE-SKL-RP | CACGCGAUTTACAGCTTGGATTGTTTTCTCAAATCGTTCAAAATTGC     |
| ERG8-FP       | ATCAACGGGUAAAATGTCAGAGTTGAGAGCCTTCAGT               |
| ERG8-RP       | CGTGCGAUTTATTTATCAAGATAAGTTTCCGGATCTT               |
| ERG8-SKL-RP   | CGTGCGAUTTACAGCTTGGATTTATCAAGATAAGTTTCCGGATCTTTTTTC |
| ERG12-FP      | ATCAACGGGUAAAATGTCATTACCGTTCTTAACTTCTGC             |
| ERG12-RP      | CGTGCGAUTTATGAAGTCCATGGTAAATTCGTGTTTC               |
| ERG12-SKL-RP  | CACGCGAUTTACAGCTTGGATGAAGTCCATGGTAAATTCGTGTTTC      |
| ERG19-FP      | AGCGATACGUAAAATGACCGTTTACACAGCATCCG                 |
| ERG19-RP      | CACGCGAUTTATTCCTTTGGTAGACCAGTCTTTG                  |
| ERG19-SKL-RP  | CACGCGAUTTACAGCTTGGATTCCTTTGGTAGACCAGTCTTTG         |
| IDI11-FP      | ATCAACGGGUAAAATGACTGCCGACAACAATAGTATGC              |
| IDI11-RP      | CGTGCGAUTTATAGCATTCTATGAATTTGCCTGTCATTTTC           |
| IDI11-SKL-RP  | CGTGCGAUTTACAGCTTGGATAGCATTCTATGAATTTGCCTGTCATTTTC  |
| C/LimS-FP     | ATCAACGGGUAAAATGAGAAGATCAGCTAACTATCAACC             |
| C/LimS-RP     | CGTGCGAUTCAACCCTTTGTACCTGGTGATG                     |



|                       |                                                |
|-----------------------|------------------------------------------------|
| <i>C</i> LimS-SKL-RP  | CGTGCGAUTTACAGCTTGGAAACCCTTTGTACCTGGTGATGCGGTG |
| ERG20-FP              | ATCAACGGGUAAAATGGCTTCAGAAAAAGAAATTAGGAGAGAG    |
| ERG20-RP              | CGTGCGAUCTATTTGCTTCTCTTGTAACCTTTGTTCAAGAAC     |
| ERG20-SKL-FP          | CGTGCGAUTTACAGTTTGCTTCTCTTGTAACCTTTGTTC        |
| <i>Pt</i> PinS-FP     | ATCAACGGGUAAAATGTCATCTACTACATCCGTTTCTAATG      |
| <i>Pt</i> PinS-RP     | CGTGCGAUTCACAATGGAACGGTTTCAACAACG              |
| <i>Pt</i> PinS-SKL-RP | CGTGCGAUTTACAGCTTGGACAATGGAACGGTTTCAACAACGGTTC |
| <i>Sp</i> SabS-FP     | ATCAACGGGUAAAATGCGACGCTCTGGGGATTACC            |
| <i>Sp</i> SabS-RP     | CGTGCGAUTCAGACATAAGGCTGGAATAGCAGG              |
| <i>Sp</i> SabS-SKL-RP | CGTGCGAUTTACAGCTTGGAGACATAAGGCTGGAATAGCAGGCC   |
| <i>Se</i> CamS-FP     | ATCAACGGGUAAAATGTGCAGCCAGCACTCTACTAAAC         |
| <i>Se</i> CamS-RP     | CGTGCGAUTCATGGAATGGAAACAGCGATGGG               |
| <i>Se</i> CamS-SKL-RP | CGTGCGAUTTACAGCTTGGATGGAATGGAAACAGCGATGGGGTC   |
| <i>Ms</i> LimH-FP     | ATCAACGGGUAAAATGGAATTGCAAATTTCTTCCGCCA         |
| <i>Ms</i> LimH-RP     | CGTGCGAUTTATGGAGATTTGTACAACGTGGG               |
| <i>cr</i> CPR-FP      | AGCGATACGUAAAATGGACTCTTCATCTGAAAAGTTGTC        |
| <i>cr</i> CPR-RP      | CACGCGAUTTACCAGACATCTCTCAAGTATCTAC             |
| <i>tc</i> CPR-FP      | AGCGATACGUAAAATGCAATCATCAAGCAGCTCGATGA         |
| <i>tc</i> CPR-RP      | CACGCGAUTTACCATACATCACGCAGATACCTG              |
| <i>Ms</i> LimS-FP     | ATCAACGGGUAAAATGGAAAGAAGATCCGTAATTACAATC       |
| <i>Ms</i> LimS-RP     | CGTGCGAUTTAAGCAAATGGTTCTGAACAAAGTTCTGG         |
| <i>Ms</i> LimS-SKL-RP | CGTGCGAUTCACAACCTTAGACCTTCTACCTCTAC            |
| <i>Ob</i> GerS-FP     | ATCAACGGGUAAAATGTCTGCTTGTACTCCATTGGC           |
| <i>Ob</i> GerS-RP     | CGTGCGAUTTATTGGGTGAAGAACAAAGCGTCAAC            |

|                             |                                                                   |
|-----------------------------|-------------------------------------------------------------------|
| <i>ObGerS</i> -SKL-RP       | CGTGCGAUTTACAGCTTGGATTGGGTGAAGAACAAAGCG                           |
| <i>CrG80H</i> -FP           | ATCAACGGGUAAAATGGACTATTTGACCATTATCTTGACTT                         |
| <i>CrG80H</i> -RP           | CGTGCGAUTTACAAGGTAGATGGAACAGCTCTT                                 |
| <i>CsPT4</i> -FP            | ATCAACGGGUAAAATGTCTGCTGGCTCTGACCAAATTG                            |
| <i>CsPT4</i> -SKL-RP        | CGTGCGAUTTACAGCTTGGAAATAAATACGTAGACGAAATACTCGGC                   |
| <i>P<sub>THD3</sub></i> -RP | ACCCGTTGAUAGCTTGTGTGTTTATTCGAAACTAAGTTC                           |
| <i>P<sub>SED1</sub></i> -RP | ACGTATCGCTCTTAATAGAGCGAACGTATTTTATTTTGCTTG                        |
| <i>P<sub>FBA1</sub></i> -FP | CGTGCGATATGACAGCAGGATTATCGTAATACGTAATAG                           |
| <i>P<sub>FBA1</sub></i> -RP | ACGTATCGCTGAATATGTATTACTTGGTTATGGTTATATATG                        |
| <i>P<sub>CWW1</sub></i> -FP | CACGCGATGGATACTTCATGCTATTTATAGACGC                                |
| <i>P<sub>CWW1</sub></i> -RP | ACCCGTTGATTATTGATATAGTGTTTAAGCGAATGACAGAAG                        |
| <i>P<sub>PGK1</sub></i> -RP | ACCCGTTGATGTTTTATATTTGTTGTAAAAAGTAGATAAATACTTCC                   |
| <i>P<sub>TEF1</sub></i> -RP | ACGTATCGCTCTTAGATTAGATTGCTATGCTTTCTTTCTAATG                       |
| <i>Gal80</i> -UP-FP         | AAGTGCAAGCATAGTGGGGCCTTCTTCCAATGCTAATCCGTCCTCAGCGAGCT<br>CGCATGG  |
| <i>Gal80</i> -DOWN-<br>RP   | CTTGATATGAGGATCTAATGGATCAGTTTTTTGAAGGCAGCCTAGTCCTGCAGG<br>GGTAACG |

**Table S8.** Nucleotide sequences of the codon optimized genes used in this study.

| Name          | Sequence (5'-3')                                                                                                                                                                                                                                                                                                                                                                                                                                                                                                                                                                                                                                                                                                                                                                                                                                                                                                                                                                                                                                                                                                                                                                                                                                                                                                                                                                                                                                                                                                                                                                                                                                                                                                                                                                                                                                                                                                                  |
|---------------|-----------------------------------------------------------------------------------------------------------------------------------------------------------------------------------------------------------------------------------------------------------------------------------------------------------------------------------------------------------------------------------------------------------------------------------------------------------------------------------------------------------------------------------------------------------------------------------------------------------------------------------------------------------------------------------------------------------------------------------------------------------------------------------------------------------------------------------------------------------------------------------------------------------------------------------------------------------------------------------------------------------------------------------------------------------------------------------------------------------------------------------------------------------------------------------------------------------------------------------------------------------------------------------------------------------------------------------------------------------------------------------------------------------------------------------------------------------------------------------------------------------------------------------------------------------------------------------------------------------------------------------------------------------------------------------------------------------------------------------------------------------------------------------------------------------------------------------------------------------------------------------------------------------------------------------|
| <i>ClimS</i>  | <p>ATGAGAAGATCAGCTAACTATCAACCATCCATTTGGGACCACGACTTTTTACA<br/> ATCCTTGAACCTAACTACACCGACGAAGCATAACAAGAGAAGAGCAGAAGA<br/> ATTACGTGGTAAAGTAAAGATAGCCATCAAAGATGTCATCGAACCTTTGGAC<br/> CAATTGGAATTGATTGATAACTTGCAAAGATTGGGTTTAGCCCATAGATTTGA<br/> AACCGAAATCAGAAACATCTTGAACAACATCTATAACAACAATAAGGATTAC<br/> AACTGGAGAAAGGAAAATTTGTACGCTACTTCCTTGGAAATTCAGATTGTTAA<br/> GACAACACGGTTACCCAGTCAGTCAAGAAGTTTTTAACGGTTTCAAGGATGA<br/> CCAAGGTGGTTTTATTTGTGATGACTTCAAGGGTATATTGTCCTTGCATGAAG<br/> CTTCTTACTACTCATTGGAAGGTGAAAGTATAATGGAAGAAGCATGGCAATT<br/> CACTTCCAAACACTTGAAGGAAGTTATGATAAGTAAAAATATGGAAGAAGAT<br/> GTTTTCGTAGCTGAACAAGCAAAGAGAGCCTTGGAAATTACCATTGCATTGGA<br/> AAGTTCCTATGTTGGAAGCAAGATGGTTCATCCATATATACGAAAGAAGAGA<br/> AGATAAGAACCATTGTTGTTGGAATTGGCAAAGATGGAATTCAATACATTA<br/> CAAGCCATCTATCAAGAAGAATTGAAGGAAATCTCTGGTTGGTGGAAAGGATA<br/> CCGTTTGGGTGAAAAGTTGTCATTGCTAGAAATAGATTGGTTCGCATCTTTC<br/> TTATGGTCAATGGGTATTGCCTTTGAACCTCAATTCGTTACTGTAGAAGAGT<br/> TTTGACAATCTCTATTGCATTGATCACCGTTATAGATGACATCTATGACGTAT<br/> ACGGTACTTTGGATGAATTGGAAATCTTTACAGACGCTGTTGAAAGATGGGA<br/> TATCAACTATGCATTAAGCATTTGCCAGGTACATGAAGATGTGCTTTTTAG<br/> CCTTGTACAACCTTCGTCAACGAATTTCGTTACTACGTTTTGAAGCAACAAGAT<br/> TTCGACTTATTGTTATCTATTA AAAACGCTTGGTTGGGTTTGATACAAGCCTA<br/> TTTGGTAGAGGCTAAGTGGTACCATTCTAAGTACACACCTAAGTTGGAAGAA<br/> TACTTGGAAAACGGTTTAGTCTCAATCACTGGTCCATTGATCATCACAATCTC<br/> CTATTTGAGTGGTACTAACCCATCATTAAAAAGGAATTGGAATTCTTGGAAAT<br/> CAAACCCAGATATCGTTCCTGCTTCAAAAATTTTCAGATTGCAAGATGAC<br/> TTAGGTA CTTCAGTGACGAAATTCAAAGAGGTGACGTACCTAAATCTATAC<br/> AATGCTACATGCATGAAACAGGTGCATCAGAAGAAGTTGCCAGACAACACAT<br/> TAAGGATATGATGAGACAAATGTGGAAAAAGGTTAATGCTTACACCGCAGAT<br/> AAAGACTCCCATTGACTGGTACTACAACCGAATTCTTGTTGAACTTAGTTAG<br/> AATGTCTCATTTTCATGTATTTGCATGGTGACGGTACGGTGTACAAAATCAAG<br/> AAACCATTGATGTCGGTTTTACTTTGTTATTCCAACCTATTCCATTAGAAGAT<br/> AAACACATGGCATTACCCGCATCACCAGGTACAAAGGGTTGA</p> |
| <i>MsLimS</i> | <p>ATGGAAAGAAGATCCGGTAATTACAATCCATCAAGATGGGATGTCAACTTCA<br/> TCCAGTCTTTGTTGTCCGATTACAAAGAAGATAAGCACGTTATCAGAGCCTCT<br/> GAATTGGTTACTTTGGTCAAGATGGAATTGGAGAAAGAAACCGACCAAATCA<br/> GACAGTTGGAATTGATTGATGACTTGCAGAGAATGGGTTTGTCCGATCATTTT<br/> CAGAACGAGTTCAAAGAGATCCTGTCCTCTATCTACTTGGATCATCATTACTA<br/> CAAGAACCCATTTCCAAAAGAAGAGAGGGACTTGTACTCTACTTCTTTGGCTT<br/> TCAGACTGTTGAGAGAACATGGTTTTCAAGTTGCCAAGAAGTTTTCGACTCT<br/> TTCAAGAATGAAGAGGGCGAGTTTAAAGAGTCTTTGTCTGACGATACAAGAG<br/> GCTTGTTGCAATTATACGAAGCCTCATTCTTGTTGACTGAAGGTGAAACTACT<br/> TTGGAATCCGCTAGAGAATTTGCTACCAAGTTCTTGGAAGAAAAGGTTAACG<br/> AAGGTGGTGTGATGGTGATTTGTTGACTAGAAATTGCCTACTCCTTGGATATT</p>                                                                                                                                                                                                                                                                                                                                                                                                                                                                                                                                                                                                                                                                                                                                                                                                                                                                                                                                                                                                                                                                                                                                                                                                                                                             |

|                      |                                                                                                                                                                                                                                                                                                                                                                                                                                                                                                                                                                                                                                                                                                                                                                                                                                                                                                                                                                                                                                                                                                                                                                                                                                                                                                                                                                                                                                                                                                                                                                                               |
|----------------------|-----------------------------------------------------------------------------------------------------------------------------------------------------------------------------------------------------------------------------------------------------------------------------------------------------------------------------------------------------------------------------------------------------------------------------------------------------------------------------------------------------------------------------------------------------------------------------------------------------------------------------------------------------------------------------------------------------------------------------------------------------------------------------------------------------------------------------------------------------------------------------------------------------------------------------------------------------------------------------------------------------------------------------------------------------------------------------------------------------------------------------------------------------------------------------------------------------------------------------------------------------------------------------------------------------------------------------------------------------------------------------------------------------------------------------------------------------------------------------------------------------------------------------------------------------------------------------------------------|
|                      | <p>CCATTGCATTGGAGAATCAAAGACCAAATGCTCCAGTTTGGATCGAGTGGT<br/> ATAGAAAAAGACCAGATATGAACCCAGTCGTTTTGGAATTGGCTATCTTGA<br/> TTTGAACATCGTCCAAGCACAATTCCAAGAAGAGTTGAAAGAATCATTGAGA<br/> TGGTGGCGTAATACCGGTTTTGTTGAAAAATTGCCATTCGCCAGAGATAGATT<br/> GGTTGAATGTTACTTTTGGAACACCGGTATCATCGAACCTAGACAACATGCTT<br/> CTGCTAGAATCATGATGGGTAAAGTTAACGCCTTGATCACCGTTATCGATGAT<br/> ATCTATGATGTTTACGGCACCTTGGAGGAATTGGAACAATTCAGTATTTGAT<br/> CAGAAGGTGGGACATCAACTCTATAGATCAATTGCCAGACTACATGCAGTTG<br/> TGTTTTTTGGCCTTGAACAACCTTCGTTGATGATACCTCTTACGACGTCATGAA<br/> AGAAAAGGGTGTAAACGTTATCCCATACTTGAGACAATCTTGGGTTGATTTGG<br/> CTGATAAGTACATGGTTGAAGCTAGATGGTTTTACGGTGGTCATAAGCCATCA<br/> TTGGAAGAATACTTGGAAAACCTCTGGCAGTCTATTTCTGGTCCATGTATGTT<br/> GACCCATATCTTCTTACAGAGTTACCGACTCCTTTACCAAAGAAACTGTTGACT<br/> CCTTGTAACAATACCACGATTTGGTTAGATGGTCCCTCATTTCGTTTTGAGATTG<br/> GCAGATGATTTGGGTACTTCTGTTGAAGAGGTTTCTAGAGGTGATGTTCCAAA<br/> GTCCTTGCAATGTTACATGTCTGATTACAACGCTTCTGAAGCTGAAGCAAGAA<br/> AACATGTTAAGTGGTTGATTGCCGAAGTCTGGAAAAAGATGAATGCCGAAAG<br/> AGTTTCTAAGGACTCTCCATTTGGTAAGGATTTTCATTGGTTGTGCTGTTGACTT<br/> GGGTAGAATGGCTCAATTGATGTACCATAATGGTGATGGTCATGGTACTCAA<br/> CATCCAATTATCCATCAACAGATGACCAGAACTTTGTTTCGAACCATTGCTTA<br/> A</p>                                                                                                                                                                                                                                                                                                                                                             |
| <p><i>PtPinS</i></p> | <p>ATGTCATCTACTACATCCGTTTCTAATGAAGATGGTGTCCCAAGAAGAATTGC<br/> TGGTCATCATTCTAATTTGTGGGATGATGATTCTATCGCCTCTTTGTCTACTTC<br/> TTATGAAGCTCCATCTTACAGAAAGAGAGCCGATAAGTTGATTGGTGAAGTC<br/> AAGAACATCTTCGACTTGATGTCTGTTGAGGATGGTGTTTTTACTTCTCCATTG<br/> TCTGACTTGCATCACAGATTGTGGATGGTTGATTCAGTTGAAAGATTGGGTAT<br/> CGACAGACATTTCAAGGACGAAATCAATTCCGCTTTGGATCACGTTTATTCTT<br/> ACTGGACCGAAAAAGGTATTGGTAGGGGTAGAGAATCTGGTGTACTGATTT<br/> GAATTCTACCGCTTTGGGTTTGAGAACCTTGAGATTGCATGGTTACACTGTTT<br/> CTTCCCACGTTTTGGATCATTTTAAGAACGAAAAGGGTCAGTTCACCTGTTCT<br/> GCTATTCAAACCTGAAGGTGAAATCAGGGATGTCTTGAATTTGTTTCAGAGCTTC<br/> CTTGATTGCTTCCCAGGTGAAAAGATTATGGAAGCTGCTGAAATTTTCTCCA<br/> CCATGTACTIONGAAAGATGCCTTGCAAAAAATTCCACCATCCGGTTTGTCTCAA<br/> GAAATCGAATACTTGTGGAATTCCGTTGGCATAACCAATTTGCCAAGAATGG<br/> AAACTAGAATGTACATCGACGTTTTTCGGTGAAGATAACCACTTTTGAAACCCCA<br/> TACTTGATCAGGGAAAAGTTGTTAGAATTGGCCAAGTTGGAGTTCAACATCTT<br/> CCATTCATTGGTCAAGAGGGAATTGCAGTCTTTATCTAGGTGGTGGAAAGATT<br/> ACGGTTTCCCAGAAATTACCTTCTCCAGACATAGACATGTCGAGTATTATACT<br/> TTGGCTGCTTGCATTGCTAACGATCCTAACATTCTGCTTTCAGATTAGGTTTC<br/> GGTAAGATCTCCCATATGATCACCATTTTGGATGATATCTACGACACCTTCGG<br/> TACTATGGAAGAATTGAAGTTGTTGACTGCTGCTTTCAAAGATGGGATCCAT<br/> CCTCTATTGAATGCTTGCCAGATTATATGAAGGGTGTTCATGGCCGTTTAC<br/> GACAACATTAACGAAATGGCTAGAGAAGCCAAAAGATTCAAGGTTGGGAT<br/> ACAGTTTCTTACGCTAGAAAATCTTGGGAAGCTTTCATTGGTGTACTTACATTCA<br/> AGAGGCTAAGTGGATTCTTCTGGTTACTTGCCAACCTTTCGATGAGTACTTGG<br/> AAAACGGTAAGGTTTCTTTCGGTCTAGAATTACTACCTTGGAACCTATGTTG<br/> ACCTTGGGTTTTCCATTGCCACCAAGAATATTGCAAGAAATTGACTTCCCCTC</p> |

|               |                                                                                                                                                                                                                                                                                                                                                                                                                                                                                                                                                                                                                                                                                                                                                                                                                                                                                                                                                                                                                                                                                                                                                                                                                                                                                                                                                                                                                                                                                                                                                                                                                                                                                                                                                                                                                                                                          |
|---------------|--------------------------------------------------------------------------------------------------------------------------------------------------------------------------------------------------------------------------------------------------------------------------------------------------------------------------------------------------------------------------------------------------------------------------------------------------------------------------------------------------------------------------------------------------------------------------------------------------------------------------------------------------------------------------------------------------------------------------------------------------------------------------------------------------------------------------------------------------------------------------------------------------------------------------------------------------------------------------------------------------------------------------------------------------------------------------------------------------------------------------------------------------------------------------------------------------------------------------------------------------------------------------------------------------------------------------------------------------------------------------------------------------------------------------------------------------------------------------------------------------------------------------------------------------------------------------------------------------------------------------------------------------------------------------------------------------------------------------------------------------------------------------------------------------------------------------------------------------------------------------|
|               | <p>CAAATCAACGATTTGATTTGCGCCATTTTGAGGTTGAAGGGTGATACTCAAT<br/> GTTACAAAGCTGATAGAGCTAGAGGTGAAGAAGCTTCAGCTGTTTCTTGTTAC<br/> ATGAAGGATCATCCAGGTATCACTGAAGAAGATGCCGTTAATCAAGTTAACG<br/> CCATGGTTGATAACCTGACCAAAGAGTTGAATTGGGAATTGCTAAGACCAGA<br/> TTCAGGTGTTCCAATCTCTTACAAGAAGGTTGCTTTTCGATATCTGCAGAGTTT<br/> TTCCTACGGTTACAAGTACAGAGATGGTTTCTCTGTTGCTTCCATCGAAATC<br/> AAGAACTTGGTTACTAGAACCGTTGTTGAAACCGTTCCATTGTGA</p>                                                                                                                                                                                                                                                                                                                                                                                                                                                                                                                                                                                                                                                                                                                                                                                                                                                                                                                                                                                                                                                                                                                                                                                                                                                                                                                                                                                                                                                      |
| <i>SpSabS</i> | <p>ATGCGACGCTCTGGGGATTACCAACCCTCTCTTTGGGATTTCAATTACATACA<br/> GTCTCTCAACACTCCGTATAAGGAGCAGAGATACGTTAATAGGCAAGCAGAG<br/> TTGATTATGCAAGTGAGGATGTTGCTTAAGGTAAAGATGGAGGCAATTCAAC<br/> AGTTGGAGTTGATTGATGACTTGCAATACCTGGGACTGTCTTATTTCTTTCCA<br/> GATGAGATTAACAAATCTTAAGTTCTATACACAATGAGCACAGATATTTCC<br/> ACAATAATGATTTGTATCTCACAGCTCTTGGATTCAGAATCCTCAGACAACAT<br/> GGTTTTAATGTTTCCGAAGATGTATTTGATTGTTTCAAGACTGAGAAGTGCAG<br/> TGATTTCAATGCAAACCTTGCTCAAGATACGAAGGGAATGTTACAACCTTTATG<br/> AAGCATCTTTCCTTTTGAGAGAAGGTGAAGATACATTGGAGCTAGCAAGACG<br/> ATTTTCCACCAGATCTCTACGAGAAAACTTGATGAAGATGGTGATGAAATT<br/> GATGAAGATCTATCATCGTGGATTCGCCATTCCTTGGATCTTCTCTTATTGG<br/> AGGATCCAAGGATTAGAGGCAAGATGGTTCTTAGATGCTTATGCGAGGAGGC<br/> CGGACATGAATCCACTTATTTCAAACCTCGCCAACTCAACTCAATATTGTT<br/> CAGGCAACATATCAAGAAGAACTCAAAGATGTCTCAAGGTGGTGGAAATAGTT<br/> CGTGCCTTGCTGAGAACTCCCATTTGTGAGAGATAGGATTGTGGAATGCTTC<br/> TTTTGGGCCATCGGGGCTTTTGAGCCTCACCAATATAGTTATCAGAGAAAAAT<br/> GGCCGCCATTATTACTTTCGTAACAATTATCGATGATGTTTATGATGTGT<br/> ATGGAACATTAGAAGAAGTGAAGTATTTACAGATATGATTCGCAGATGGGA<br/> TAATATATCAATAAGCCAACCTCCATATTATATGCAAGTGTGCTATTTGGCAC<br/> TATACAACTTCGTTTCTGAGCGGGCTTACGATATTCTAAAAGATCAACATTT<br/> AACAGCATCCCATATTTACAGAGATCGTGGGTAAGTTTGGTTGAAGGATATCT<br/> TAAGGAGGCATACTGGTACTACAATGGCTATAAACCAAGCTTGAAGAATAT<br/> CTCAACAACGCCAAGATTTCAATATCGGCTCCTACAATCATATCCAGCTTTA<br/> TTTTACATTAGCAAACCTCGACTGATGAAACAGTTATCGAGAGCTTATACGAAT<br/> ATCATAACATACTTTACCTATCAGGAACCATATTAAGGCTTGCTGACGATCTT<br/> GGGACATCACAACATGAGCTGGAGAGAGGAGACGTCCCGAAAGCAATCCAG<br/> TGCTACATGAAGGACACAAATGCTTCGGAGAGAGAGGGCGGTGGAACACGTG<br/> AAGTTTCTGATAAGGGAGACGTGGAAGGAGATGAACACGGTCACAACAGCC<br/> AGCGATTGTCCGTTTACGGATGATTTGGTTGCGGTCGCAACTAATCTTGCAAG<br/> GGCGGCTCAGTTTATATATCTCGACGGGGATGGGATTGGCGTGCAACACTCG<br/> GAAATACATCAACAGATGGGAGGCCTGCTATTCCAGCCTTATGTCTGA</p> |
| <i>SeCamS</i> | <p>ATGTGCAGCCAGCACTCTACTAAACCATTTAGTCACTCTCCTAATATTTCCAC<br/> TAATCTAATTTTATCTTCAGATGGAAGTAATCCTACTAGACGTTTCAAGGAATT<br/> ACGACCCTACTAAGTGGGATTATGAATATATTCAGTCCGCAAACAATCATTAT<br/> ACGGGAGAGAAGTATATGAAGCGATTTAACGAGCTAAAGGCCAAAAATTAAG<br/> AAAGAATTGATGATGGTTCATGAGGAATCACAAGAATTAGACAAGTTAGAGT<br/> TGATTGATAATTTAGAAAGGCTTGGAGTCAGTTACCACTTCAAGGATGAAATT<br/> ATGCAAATATTAAGGAGCATTAATGACCAAAGTAATATTGCAGCCACGTCAG</p>                                                                                                                                                                                                                                                                                                                                                                                                                                                                                                                                                                                                                                                                                                                                                                                                                                                                                                                                                                                                                                                                                                                                                                                                                                                                                                                                                                                                                                             |

|                      |                                                                                                                                                                                                                                                                                                                                                                                                                                                                                                                                                                                                                                                                                                                                                                                                                                                                                                                                                                                                                                                                                                                                                                                                                                                                                                                                                                                                                                                                                                                                                                                                         |
|----------------------|---------------------------------------------------------------------------------------------------------------------------------------------------------------------------------------------------------------------------------------------------------------------------------------------------------------------------------------------------------------------------------------------------------------------------------------------------------------------------------------------------------------------------------------------------------------------------------------------------------------------------------------------------------------------------------------------------------------------------------------------------------------------------------------------------------------------------------------------------------------------------------------------------------------------------------------------------------------------------------------------------------------------------------------------------------------------------------------------------------------------------------------------------------------------------------------------------------------------------------------------------------------------------------------------------------------------------------------------------------------------------------------------------------------------------------------------------------------------------------------------------------------------------------------------------------------------------------------------------------|
|                      | <p>CAGATTCATTATATTACACTGCCTTGAAATTTAGGATATTGAGGCAACATGGA<br/> TTTTATATCTCTCAAGATATACTGAACGATTTCAAGGATGAGAAGGGTAACTT<br/> CAAGCAAAGTCTTTGTGAAGACATAGAAGGATTGTTACAATTATATGAAGCA<br/> TCATTTCTCTCAACGGATTCTGAAACATCTTCTTTGTTAGAATCCGCCAATAC<br/> ATTCGCAACGTCACGTCTAAGGAAATATTTGGACAATTTAAATGGTGATGTTA<br/> ATGAGAATTGGAGAGTGGAACTAGTGCGCCATGCCTTGGAACTTCCTTCGCA<br/> CTGCATGTTGTTGAGAGTTGAGACAAGATGGTACATTAACATGTATGAGAAA<br/> ATACCAAATGCTGATCCTCTTCTGCTCGAGTTTGCTAAATTGGATTCAATATT<br/> GTGCAAGCAACACACCAACAAGAACTAAGAAATCTATCAAGGTGGTGGAAAG<br/> GAGTCATGGCTTGCAGAAAAATTGTCATTTTCAAGGGACAGAATAGTTGAAT<br/> CTTTCTTATGGATAGCTGGCATGATGTTTGAGCCTCAAAGGAACGAACTCTCT<br/> CGAACATTGTTAACAAAGGTCACTGCTATCGCGACAATTATAGATGATATTTA<br/> TGATGTTTATGGCACTCTTGATGAATTAGAAATCTTCACTCAAGCTGTTGAAA<br/> GGATGGAGGTAAGCAATGGATGAGCTTCCAGATTATATGAAAGTATGTTA<br/> TCTTACACTCATCAATAATACCAATGAAGTGGCGTATGAGGTTCTCAAAGAG<br/> CAAGGGATAAATGTCACACCTTACCTTACAAAAGCATGGACAGATTTATGCA<br/> AAGCATACTTACAAGAAGCAAGATGGTACTATAGTGGATATACTCCAAGTAT<br/> GGAAGAATACATGGAAAATGCATGGGTTTTCAGTTGGAAGTCCAGTGATGGTA<br/> GTGAATGCATTTTTCTTAGTCACAAATCCAATTACCAAAGAGGCATTGGAACA<br/> CCTATTCTTAAACAAGTACACAGAAATAATTCGTTGGTCTGCTGCAATTATTC<br/> GTCTCACTGATGACTTAGCCACATCATCTAATGAAATGGAAAGAGGTGATGT<br/> TTCCAAGTCGATTCAGTGTTACATGAAAGAGAAGGGCGCTACAGAAGAAGAG<br/> GCAAGAAAACATATCAATTTTATGATAAGGGATGCATGGAAACGAATCAACA<br/> CAGCTCAAAGAGATAATCCATTATTTTGTGAAGAATTTATTAGCTGTGGAATG<br/> AATATTGCAAGAAGTGGACAGACCATATACCAGCATGGAGATGGAGTCGGAA<br/> TTCAAATTTATGAGATCCAAAATCGCATTTACAAATTATTTTTTGACCCCATC<br/> GCTGTTCCATTCCATGA</p> |
| <p><i>ObGerS</i></p> | <p>ATGTCTGCTTGTACTCCATTGGCTTCAGCTATGCCATTATCTTCTACACCATTG<br/> ATTAACGGTGACAACCTCCCAAAGAAAGAACACCAGACAACATATGGAAGAG<br/> TCCTCTTCAAAGAGAAGGGAATACTTGTTGGAAGAAACCACCAGAAAAGTTGC<br/> AAAGAAACGATACCGAATCCGTCGAAAAGTTGAAGTTGATCGATAACATCCA<br/> ACAGCTAGGTATCGGTTACTACTTTGAAGATGCTATTAACGCCGTTTTGAGGT<br/> CCCCATTTTCTACTGGTGAAGAAGATTTGTTTACTGCCGCTTTGAGATTCAGG<br/> TTGTTGAGACATAACGGTATCGAAATCTCCCAGAGATTTTCTTGAAGTTCAA<br/> AGACGAAAGAGGTAAGTTCGACGAATCTGATACTTTGGGTTTGTGTCCTTGT<br/> ACGAAGCTTCTAATTTGGGTGTTGCCGGTGAAGAAATATTGGAAGAAGCTAT<br/> GGAATTTGCCGAAGCTAGATTGAGAAGATCATTGTCTGAACCAGCTGCTCCA<br/> TTGCATGGTGAAGTTGCTCAAGCTTTAGATGTTTCTAGACATTTGAGAATGGC<br/> AAGATTGGAAGCCAGAAGATTCATTGAACAATACGGTAAGCAATCCGATCAC<br/> GATGGTGATTTGTTGGAATTGGCTATCTTGGATTACAACCAGGTTCAAGCTCA<br/> ACACCAATCTGAATTGACCGAAATTATCAGGTGGTGGAAAGAATTGGGTCTA<br/> GTTGATAAGTTGTCCTTCGGTAGAGATAGACCATTGGAATGTTTTTTGTGGAC<br/> CGTTGGTTTTGTTGCCAGAACCTAAATATTCCTCCGTTAGAATTGAATTGGCCA<br/> AGGCCATTTCCATCTTGTGGTTATTGATGATATCTTCGACACCTACGGTGAA<br/> ATGGATGATTTGATTTTGTTCACCGATGCCATCAGAAGATGGGACTTAGAAGC<br/> AATGGAAGGTTTGCCAGAGTATATGAAGATTTGCTATATGGCCTTGTACAAC<br/> ACCACCAACGAAGTTTGTTACAAGGTTTGGAGAGACACCGGTAGAATCGTTTT</p>                                                                                                                                                                                                                                                                                                                                                                                   |

|                                                                                                                                                                                                                                                                                                                                                                                                                                                                                                                                                                                                                 |
|-----------------------------------------------------------------------------------------------------------------------------------------------------------------------------------------------------------------------------------------------------------------------------------------------------------------------------------------------------------------------------------------------------------------------------------------------------------------------------------------------------------------------------------------------------------------------------------------------------------------|
| GTTGAACTTGAAGTCTACCTGGATCGATATGATCGAAGGTTTCATGGAAGAG<br>GCTAAGTGGTTTAATGGTGGTTCTGCTCCAAAATTGGAAGAGTACATTGAAA<br>ACGGTGTTCCTACTGCTGGTGCTTATATGGCTTTTGCCACATATTTTCTTGA<br>TCGGTGAAGGTGTTACCCACCAAACTCTCAATTATTCACCCAAAAGCCTTAT<br>CCAAAGGTTTTTTCAGCTGCTGGTAGAATCTTGAGATTGTGGGATGACTTGGG<br>TACTGCTAAAGAAGAACAAGAAAGAGGCGATTTGGCTTCTTGTGTTTCAAGTTG<br>TTTATGAAGGAAAAGTCCTTGACCGAAGAAGAAGCCAGATCCAGAATTTGG<br>AAGAGATCAAAGGTTTGTGGCGTGATTTGAATGGTGAATTGGTTTACAACAA<br>GAACCTGCCATTGTCCATTATTAAGGTTGCTTTGAATATGGCCAGAGCCTCTC<br>AAGTTGTTTACAAACATGATCAGGATACCTACTTCTCCTCCGTTGATAATTAT<br>GTTGACGCTTTGTTCTTCACCCAATAA |
|-----------------------------------------------------------------------------------------------------------------------------------------------------------------------------------------------------------------------------------------------------------------------------------------------------------------------------------------------------------------------------------------------------------------------------------------------------------------------------------------------------------------------------------------------------------------------------------------------------------------|

## SI References

1. S. Lupien, F. Karp, M. Wildung, R. Croteau, Regiospecific Cytochrome P450 Limonene Hydroxylases From Mint (*Mentha*) Species: cDNA Isolation, Characterization, and Functional Expression of (-)-4S-limonene-3-hydroxylase and (-)-4S-limonene-6-hydroxylase. *Arch Biochem Biophys* **368**, 181-192 (1999).
2. J. Lucker *et al.*, Metabolic engineering of monoterpene biosynthesis: two-step production of (+)-trans-isopiperitenol by tobacco. *Plant J* **39**, 135-145 (2004).
3. K. Miettinen *et al.*, The seco-iridoid pathway from *Catharanthus roseus*. *Nat Commun* **5**, 3606 (2014).
4. C. Ignea *et al.*, Improving yeast strains using recyclable integration cassettes, for the production of plant terpenoids. *Microb Cell Fact* **10**, 4 (2011).
5. B. J. Thomas, R. Rothstein, Elevated recombination rates in transcriptionally active DNA. *Cell* **56**, 619-630 (1989).
6. M. Ellerstrom, L. G. Josefsson, L. Rask, H. Ronne, Cloning of a cDNA for rape chloroplast 3-isopropylmalate dehydrogenase by genetic complementation in yeast. *Plant Mol Biol* **18**, 557-566 (1992).
7. N. B. Jensen *et al.*, EasyClone: method for iterative chromosomal integration of multiple genes in *Saccharomyces cerevisiae*. *FEMS Yeast Res* **14**, 238-248 (2014).
8. D.-C. Chen, B.-C. Yang, T.-T. Kuo, One-step transformation of yeast in stationary phase. *Current Genetics* **21**, 83-84 (1992).
